# Supplementary material for: Synthesis of 2-anilinopyridyl–triazole conjugates as antimitotic agents
Source: Royal Society of Chemistry journal article supplement (doi:10.1039/c5ob00232j), 2015-01-01
Supplement: c5ob00232j1.pdf [file c5ob00232j1.pdf]

## Supporting information

### Contents

- Materials and Methods of compounds (**6a-t**) 3-4
- Experimental procedures and spectral data of (**6a-t**) 5-33

# Synthesis of 2-Anilinopyridyl-Triazole Conjugates as Antimitotic Agents

Ahmed Kamal<sup>\*,a,b,c,d</sup> A.V. Subba Rao,<sup>a,b</sup> M.V.P.S Vishnuvardhan,<sup>a</sup> T. Srinivas Reddy,<sup>c</sup> Konderu Swapna,<sup>d</sup> Chandrakant Bagul,<sup>d</sup> N.V. Subba Reddy<sup>a</sup> and Vunnam srinivasulu<sup>a</sup>

<sup>a</sup>Medicinal Chemistry and Pharmacology, <sup>b</sup>Academy of Scientific and Innovative Research,

<sup>c</sup>IICT-RMIT Research Centre, CSIR-Indian Institute of Chemical Technology, Hyderabad, 500007, India.

<sup>d</sup>Department of Medicinal Chemistry, National Institute of Pharmaceutical Education & Research (NIPER), Hyderabad 500 037, India.

\*Correspondence: [ahmedkamal@iict.res.in](mailto:ahmedkamal@iict.res.in); Phone: (+) 91-40-27193157; Fax: (+) 91-40-27193189

## MATERIAL AND METHODS

All chemicals and reagents were obtained from Aldrich (Sigma– Aldrich), St. Louis, MO, USA), Lancaster (Alfa Aesar, Johnson Matthey Company, Ward Hill, MA, USA), or Spectrochem Pvt. Ltd (Mumbai, India) and were used without further purification. Reactions were monitored by TLC performed on silica gel glass plate containing 60 GF-254, and visualization was achieved by UV light or iodine indicator. Column chromatography was performed with Merck 60–120 mesh silica gel.  $^1\text{H}$  and  $^{13}\text{C}$  NMR spectra were determined in  $\text{CDCl}_3$  by using Varian and Avance instruments. Chemical shifts are expressed in parts per million ( $\delta$  in ppm) downfield from internal TMS and coupling constants are expressed in Hz.  $^1\text{H}$  NMR spectroscopic data are reported in the following order: multiplicity (s, singlet; br s, broad singlet; d, doublet; dd, doublet of doublets; t, triplet; m, multiplet), coupling constants in Hz, number of protons. ESI mass spectra were recorded on a Micro mass Quattro LC using ESI+ software with capillary voltage 3.98 kV and an ESI mode positive ion trap detector. Melting points were determined with an Electro thermal melting point apparatus, and are uncorrected.

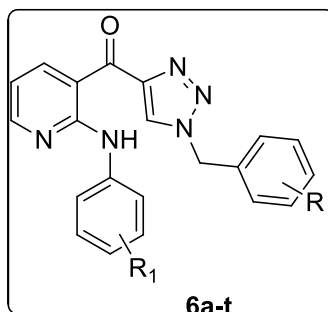

| S. No | Compound | R <sub>1</sub> | R         |
|-------|----------|----------------|-----------|
| 1     | 6a       | 4-OMe          | 4-OMe     |
| 2     | 6b       | 4-OMe          | 3,4-diOMe |
| 3     | 6c       | 4-OMe          | 3,5-diOMe |
| 4     | 6d       | 4-OMe          | 3-OPh     |
| 5     | 6e       | 4-OMe          | 4-F       |
| 6     | 6f       | 3,4-diOMe      | 4-OMe     |
| 7     | 6g       | 3,4-diOMe      | 3,4-diOMe |
| 8     | 6h       | 3,4-diOMe      | 3,5-diOMe |
| 9     | 6i       | 3,4-diOMe      | 3-OPh     |
| 10    | 6j       | 3,4-diOMe      | 4-F       |
| 11    | 6k       | 3,4,5-triOMe   | 4-OMe     |
| 12    | 6l       | 3,4,5-triOMe   | 3,4-diOMe |
| 13    | 6m       | 3,4,5-triOMe   | 3,5-diOMe |
| 14    | 6n       | 3,4,5-triOMe   | 3-OPh     |
| 15    | 6o       | 3,4,5-triOMe   | 4-F       |
| 16    | 6p       | 4-F            | 4-OMe     |
| 17    | 6q       | 4-F            | 3,4-diOMe |
| 18    | 6r       | 4-F            | 3,5-diOMe |
| 19    | 6s       | 4-F            | 3-OPh     |
| 20    | 6t       | 4-F            | 4-F       |

### General method for synthesis of (1-benzyl-1H-1,2,3-triazol-4-yl)(2-(phenylamino)pyridin-3-yl)methanone (**6a-t**)

To a solution of substituted ethynyl ketones (**14a-d**) (0.59 mmol) and substituted benzyl azides (**17a-e**) (0.65 mmol) in 2:1 mixture of water and tert-butyl alcohol, sodium ascorbate (0.06 mmol) and copper (II) sulfate (0.03 mmol) were added sequentially. The reaction was stirred at room temperature for overnight, TLC analysis indicated completion of reaction. The solvent was concentrated under vacuum and extracted with EtOAc to give crude product. The crude products were purified by column chromatography to afford pure products (**6a-t**) as yellow solids.

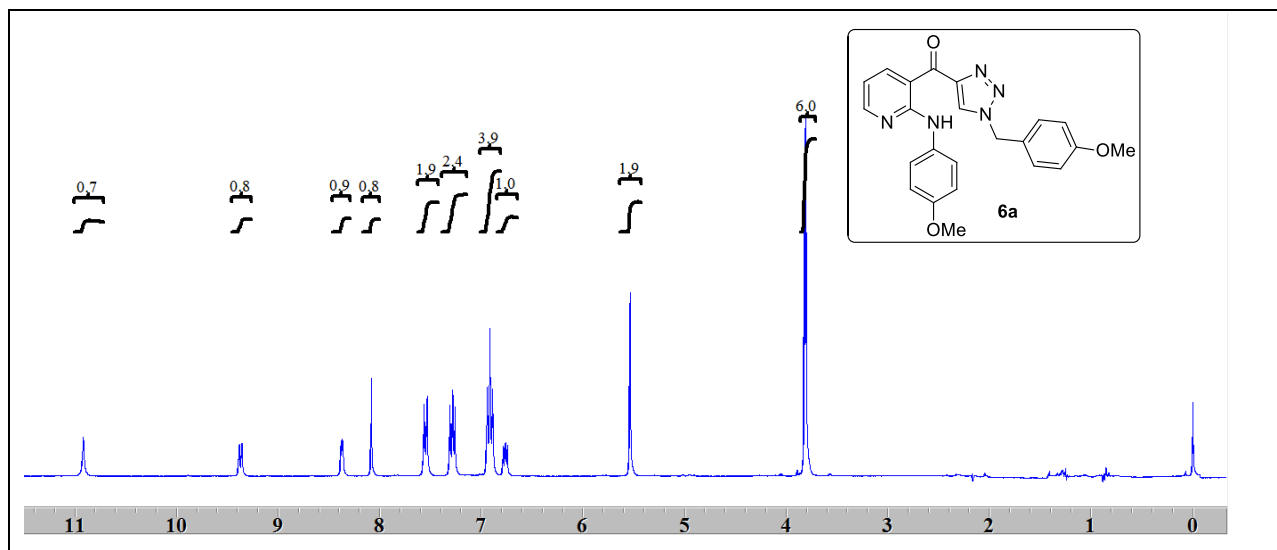

**<sup>1</sup>H NMR SPECTRUM OF COMPOUND 6a**

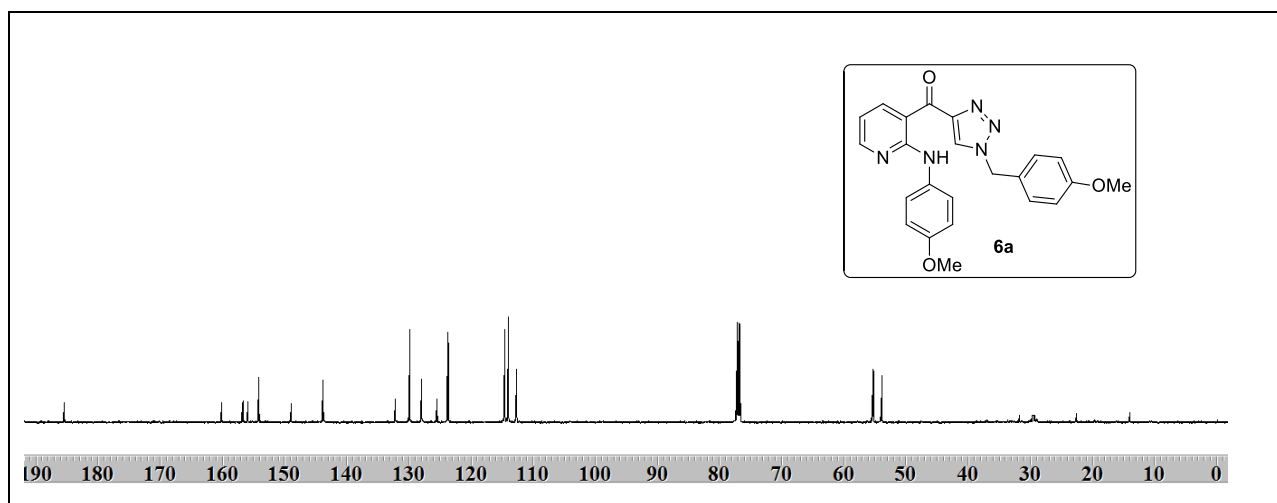

**<sup>13</sup>C NMR SPECTRUM OF COMPOUND 6a**

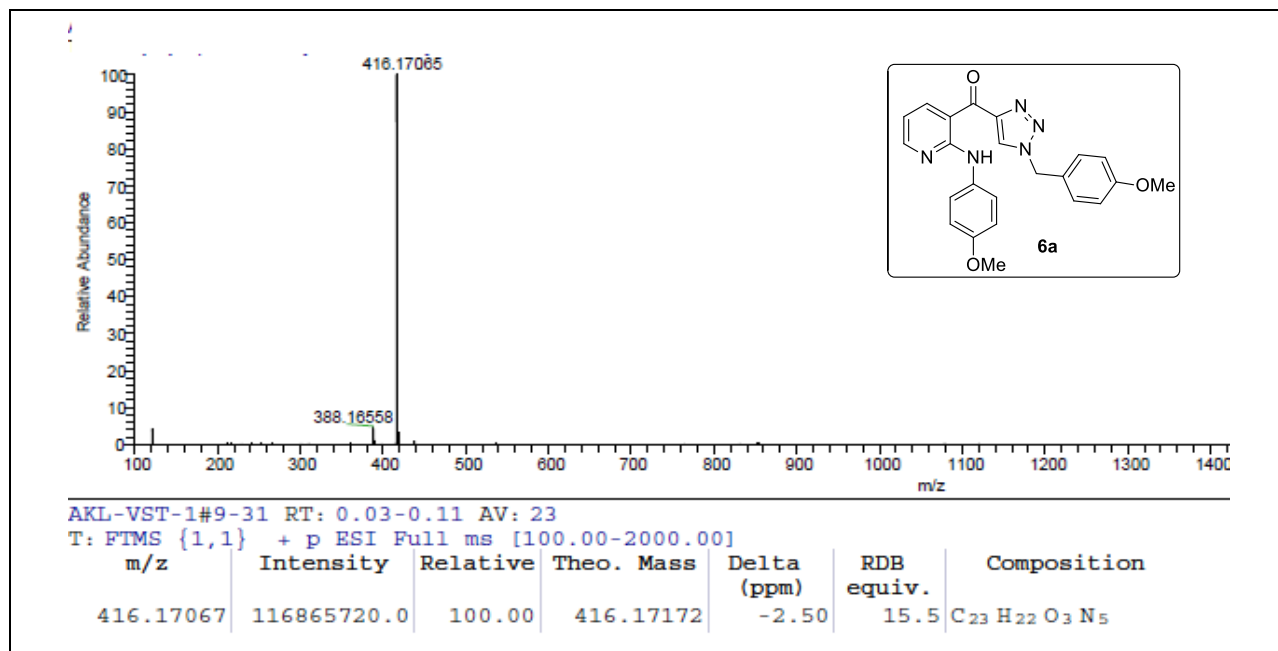

### HIGH RESOLUTION MASS SPECTRUM OF COMPOUND 6a

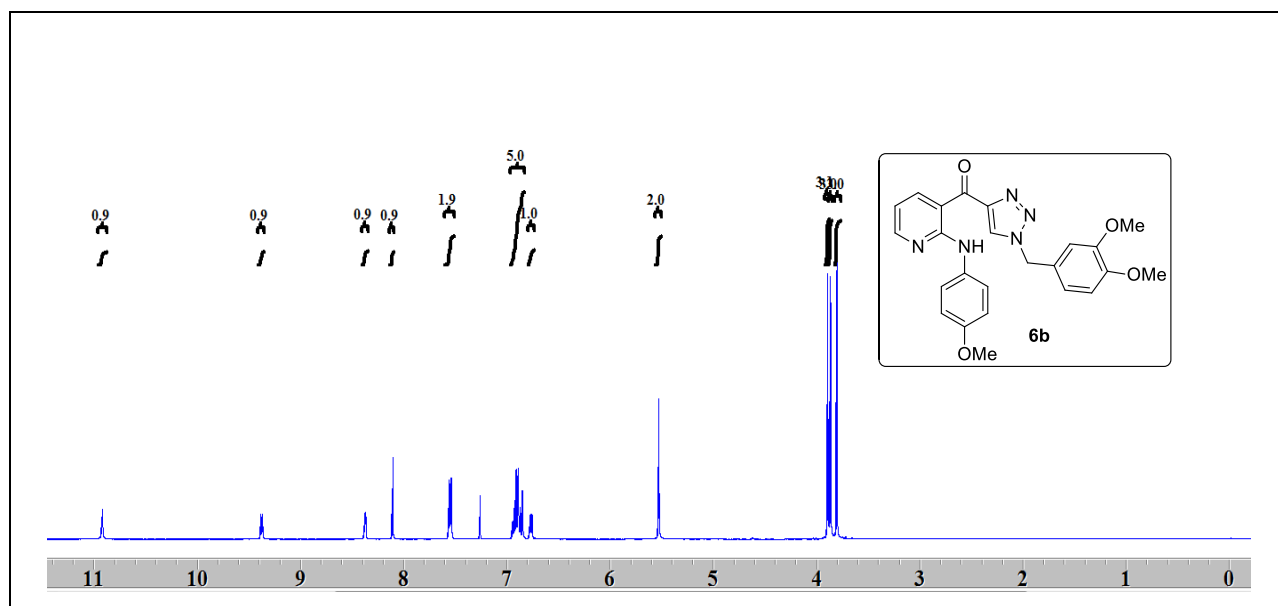

### <sup>1</sup>H NMR SPECTRUM OF COMPOUND 6b

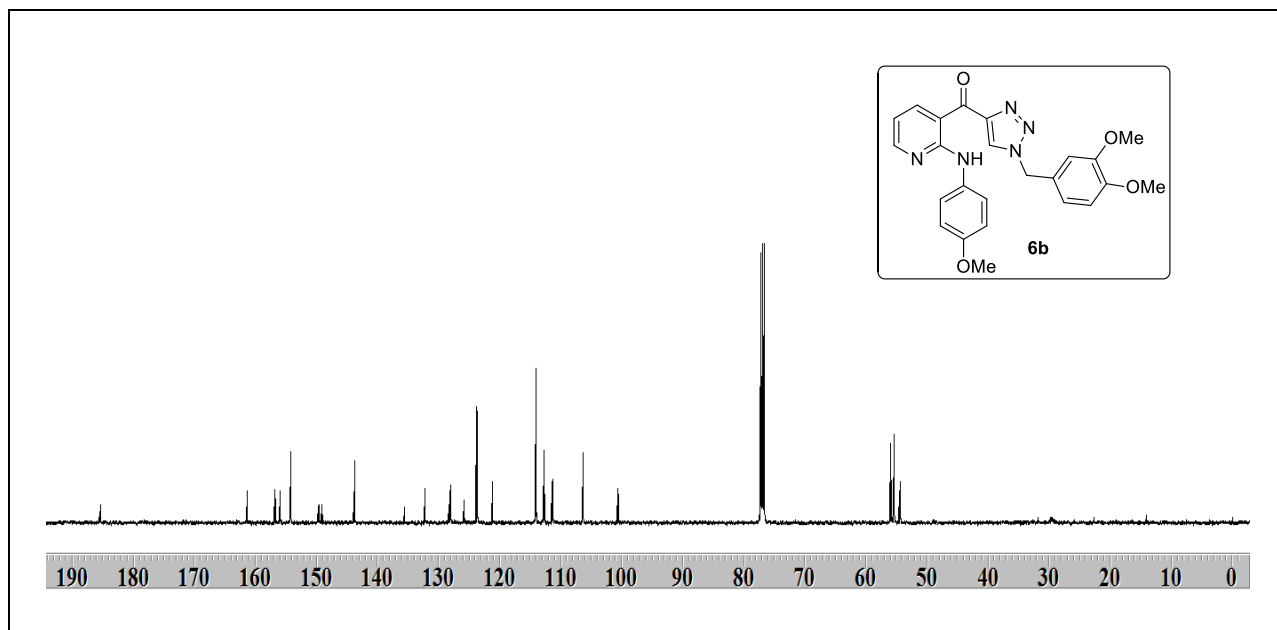

**<sup>13</sup>C NMR SPECTRUM OF COMPOUND 6b**

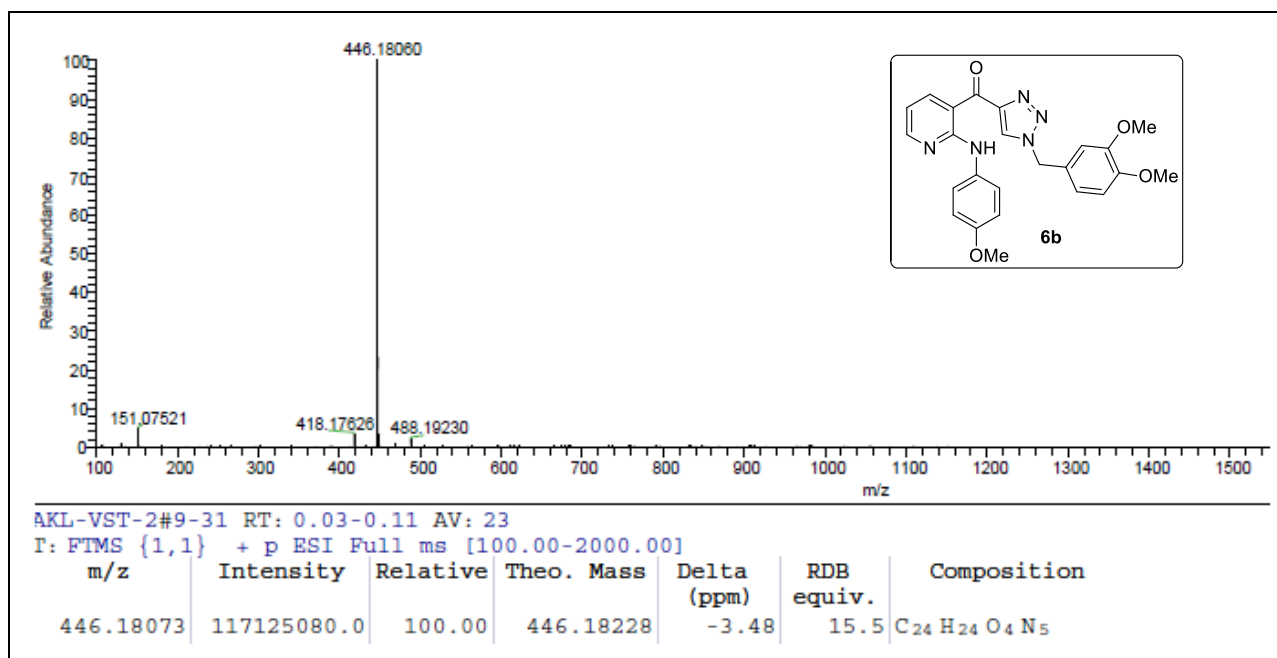

**HIGH RESOLUTION MASS SPECTRUM OF COMPOUND 6b**

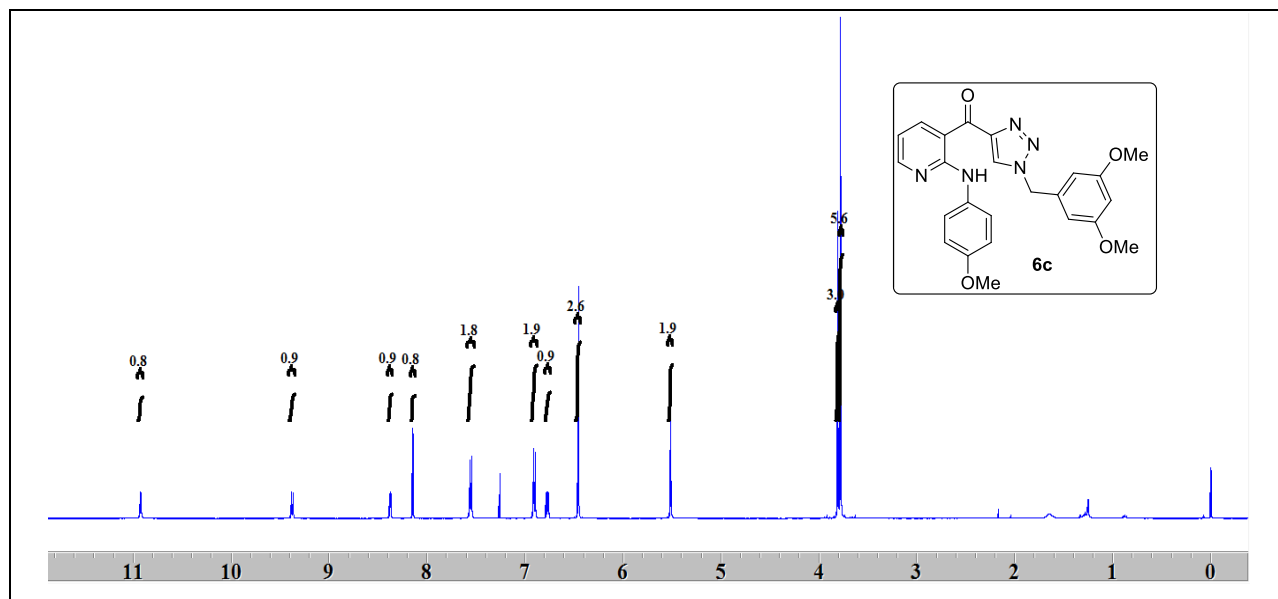

**<sup>1</sup>H NMR SPECTRUM OF COMPOUND 6c**

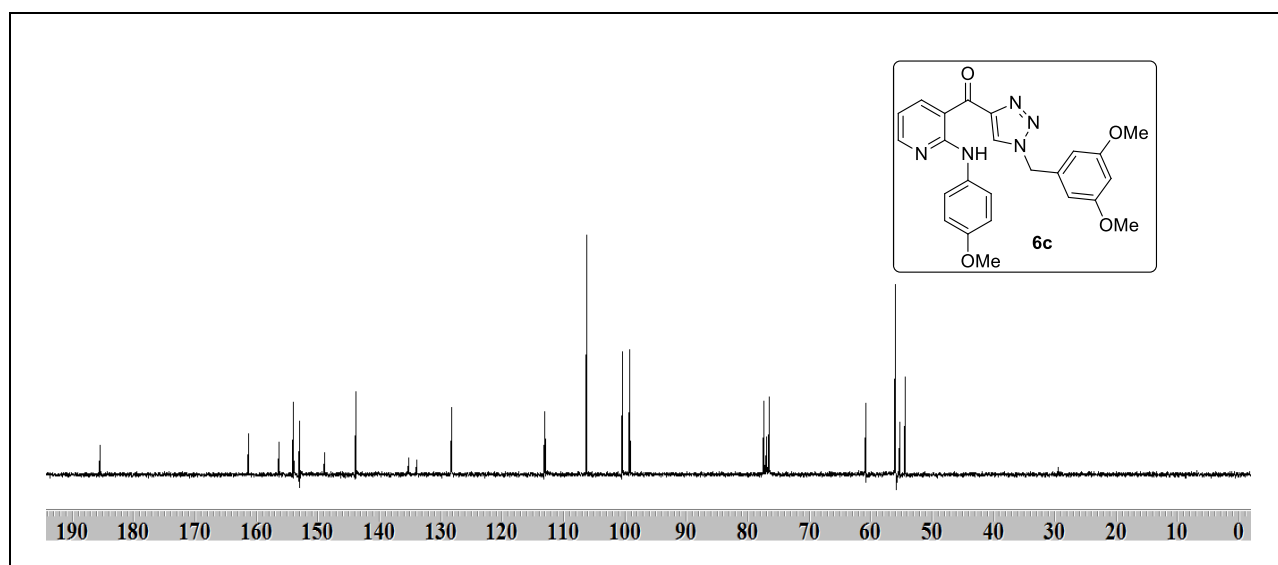

**<sup>13</sup>C NMR SPECTRUM OF COMPOUND 6c**



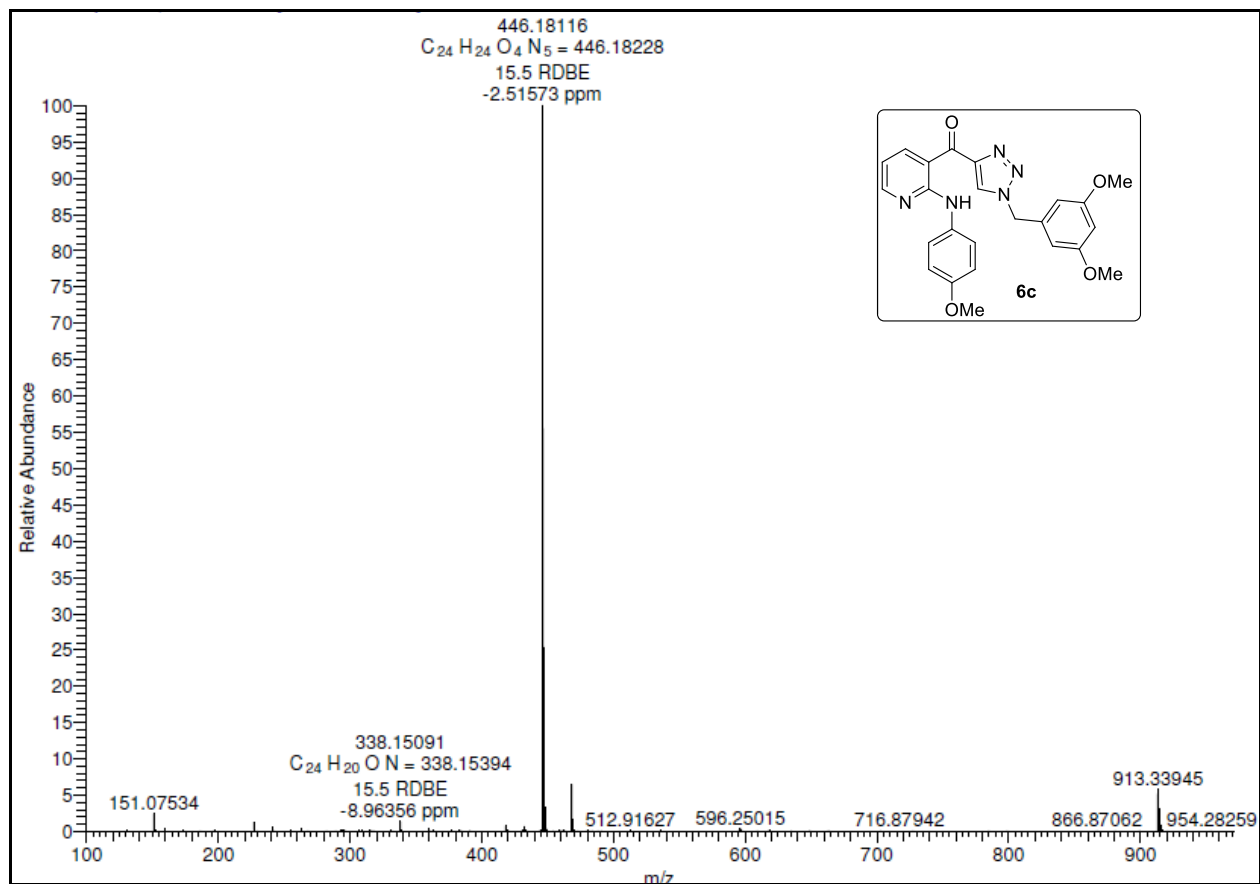

**HIGH RESOLUTION MASS SPECTRUM OF COMPOUND 6c**

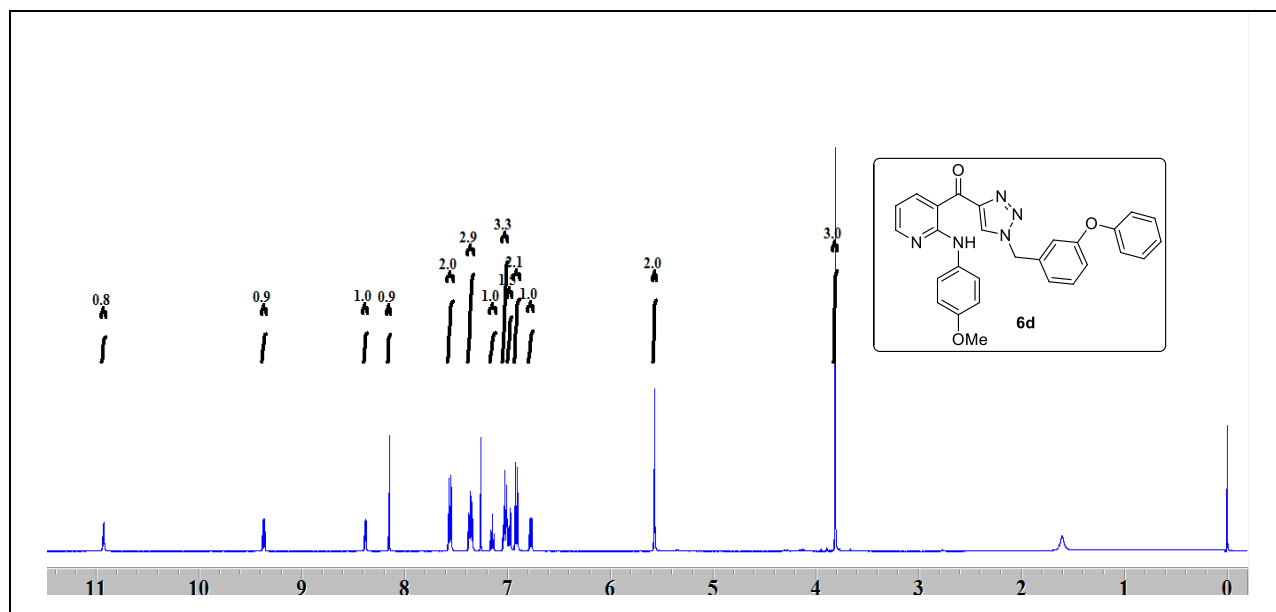

**$^1H$  NMR SPECTRUM OF COMPOUND 6d**

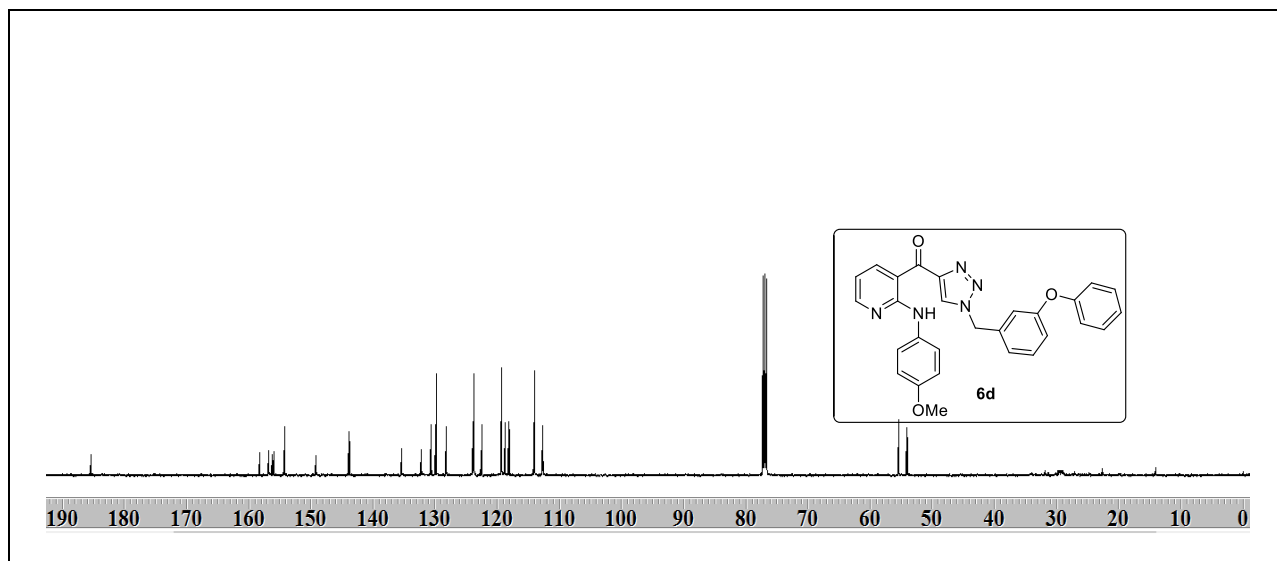

**<sup>13</sup>C NMR SPECTRUM OF COMPOUND 6d**

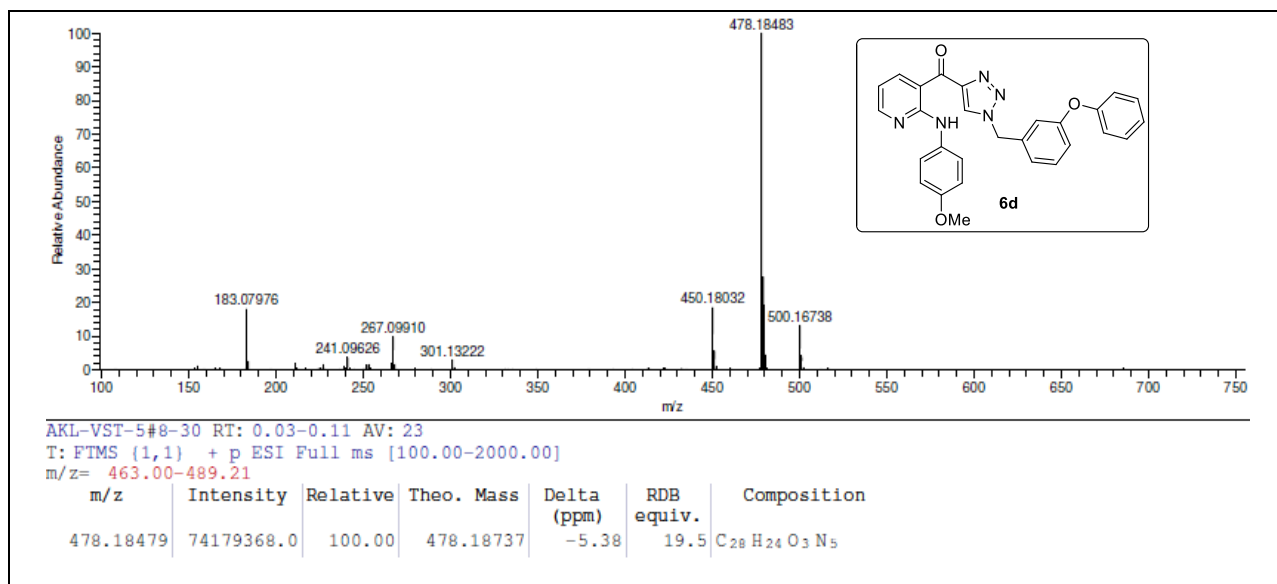

**HIGH RESOLUTION MASS SPECTRUM OF COMPOUND 6d**

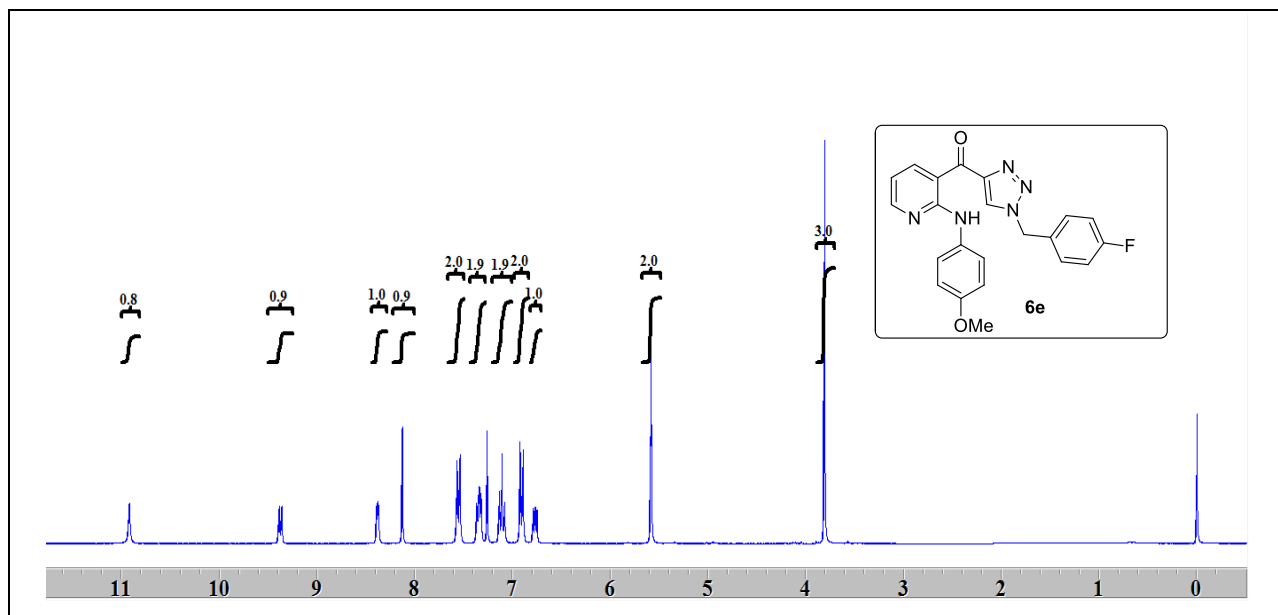

**<sup>1</sup>H NMR SPECTRUM OF COMPOUND 6e**

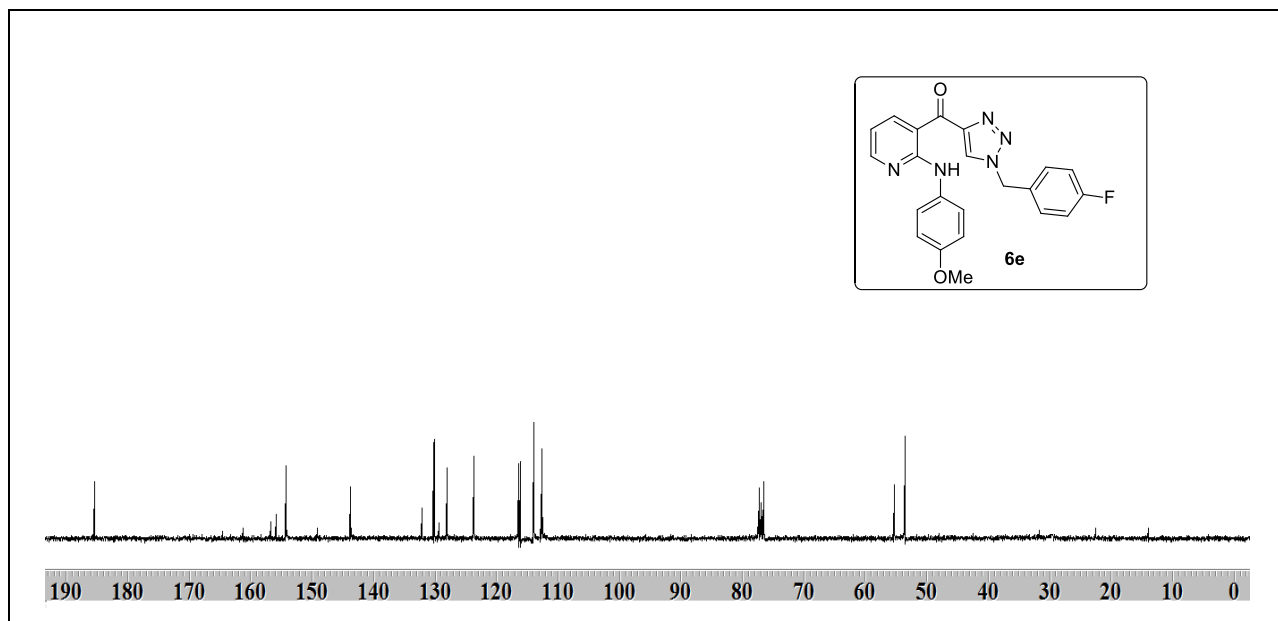

**<sup>13</sup>C NMR SPECTRUM OF COMPOUND 6e**

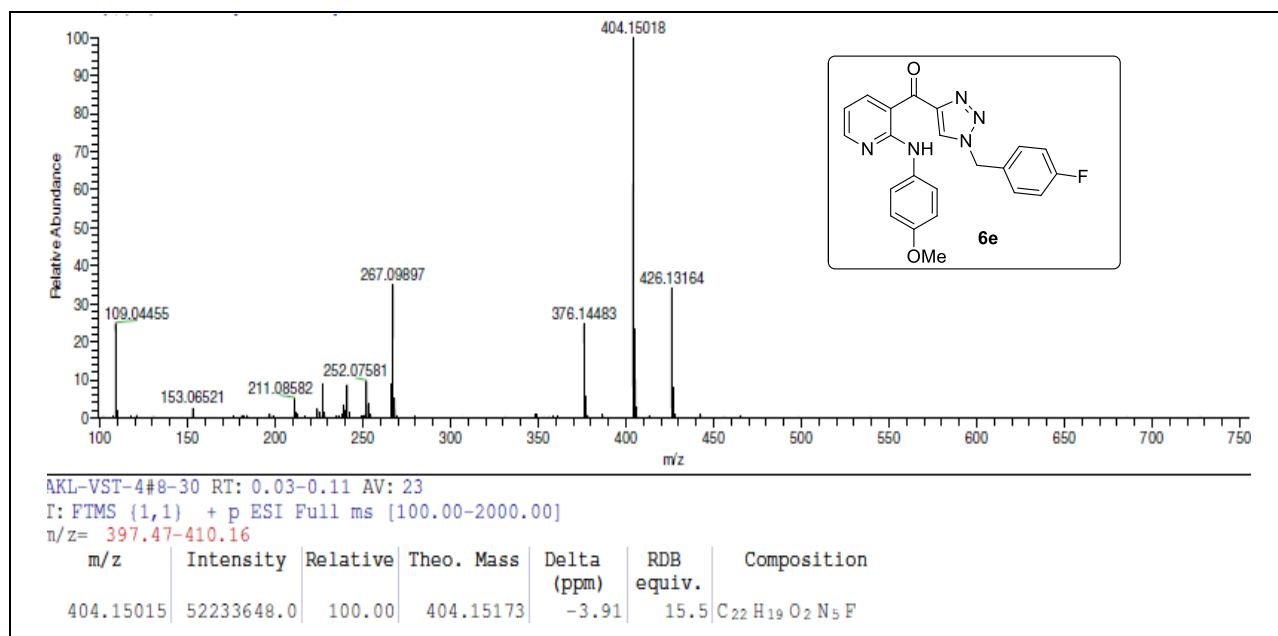

**HIGH RESOLUTION MASS SPECTRUM OF COMPOUND 6e**

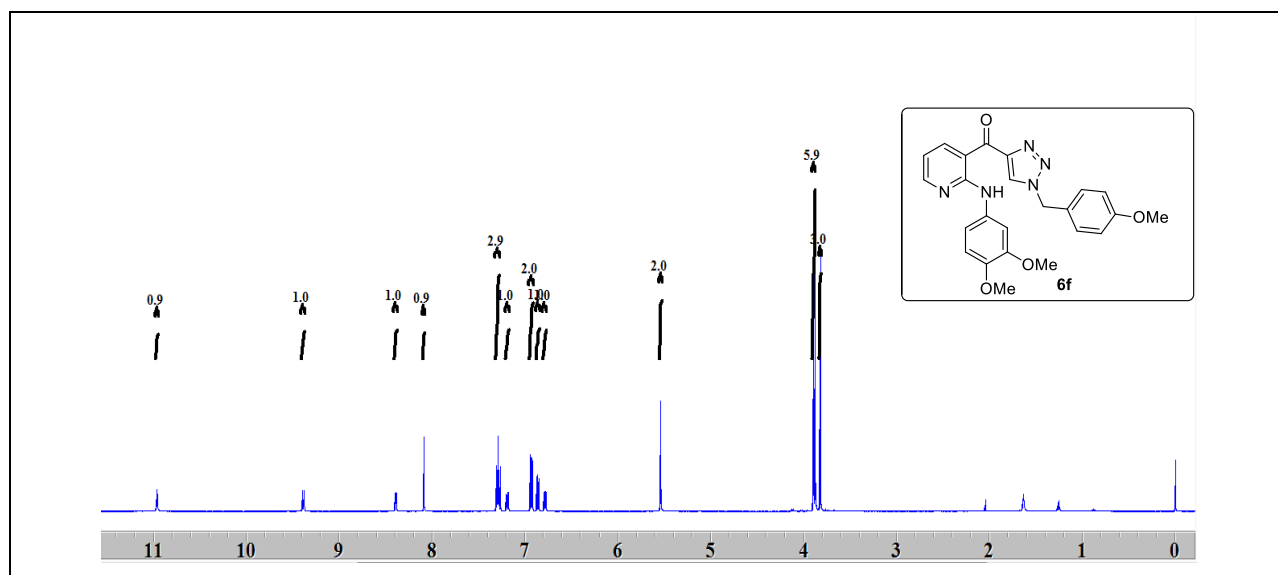

**<sup>1</sup>H NMR SPECTRUM OF COMPOUND 6f**

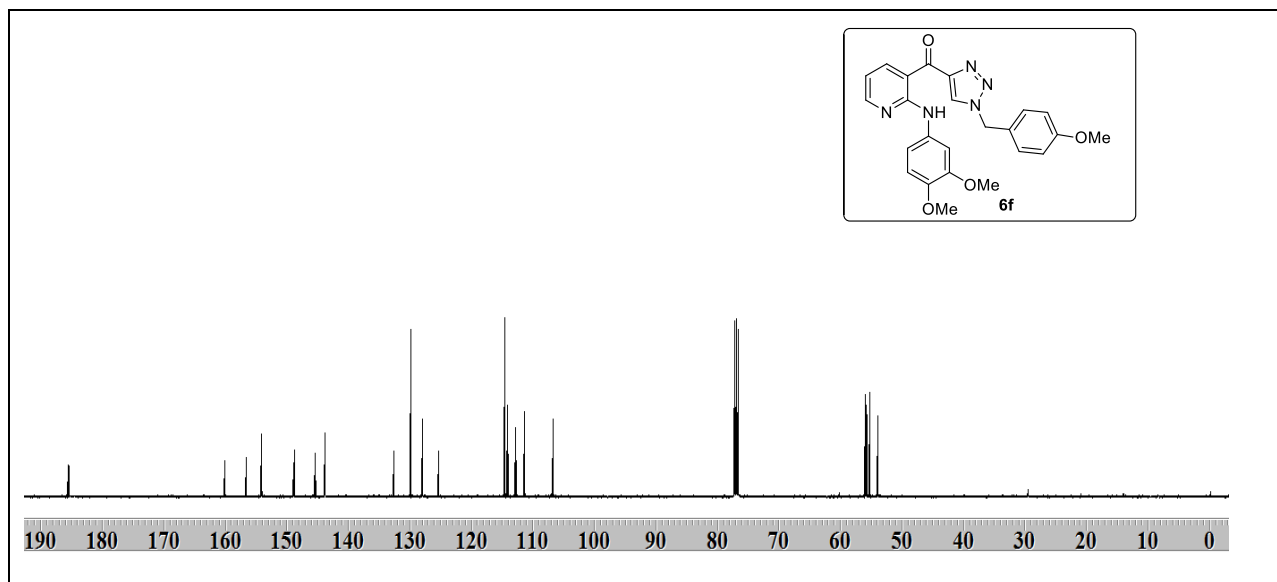

**<sup>13</sup>C NMR SPECTRUM OF COMPOUND 6f**

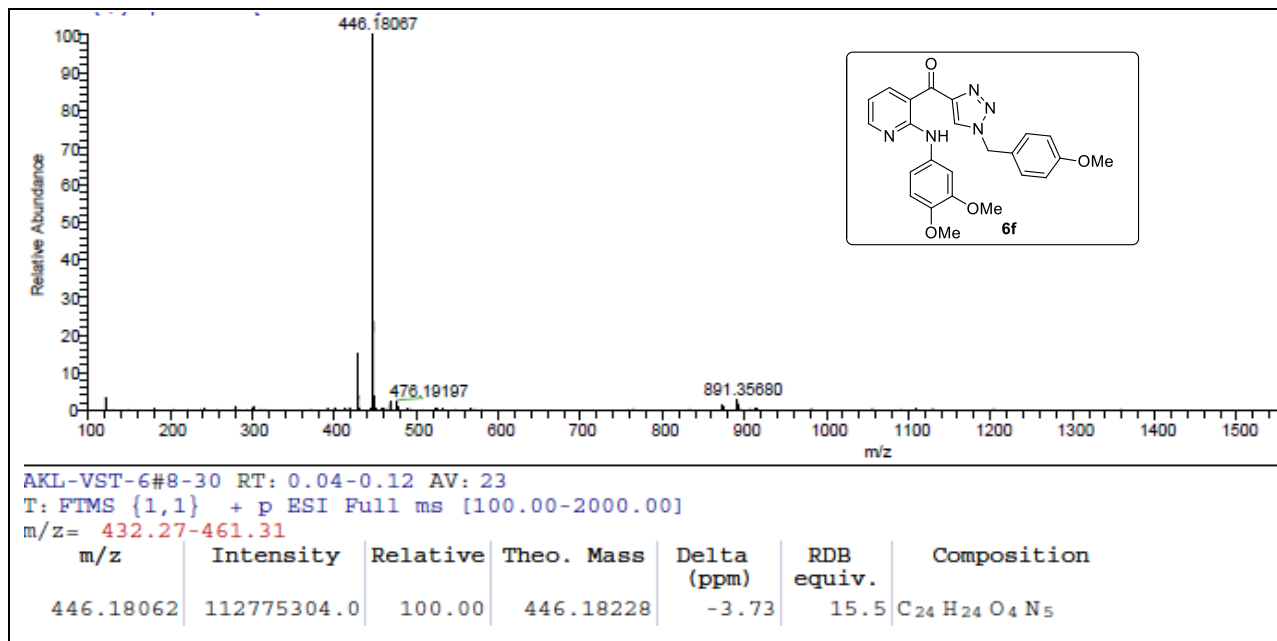

**HIGH RESOLUTION MASS SPECTRUM OF COMPOUND 6f**

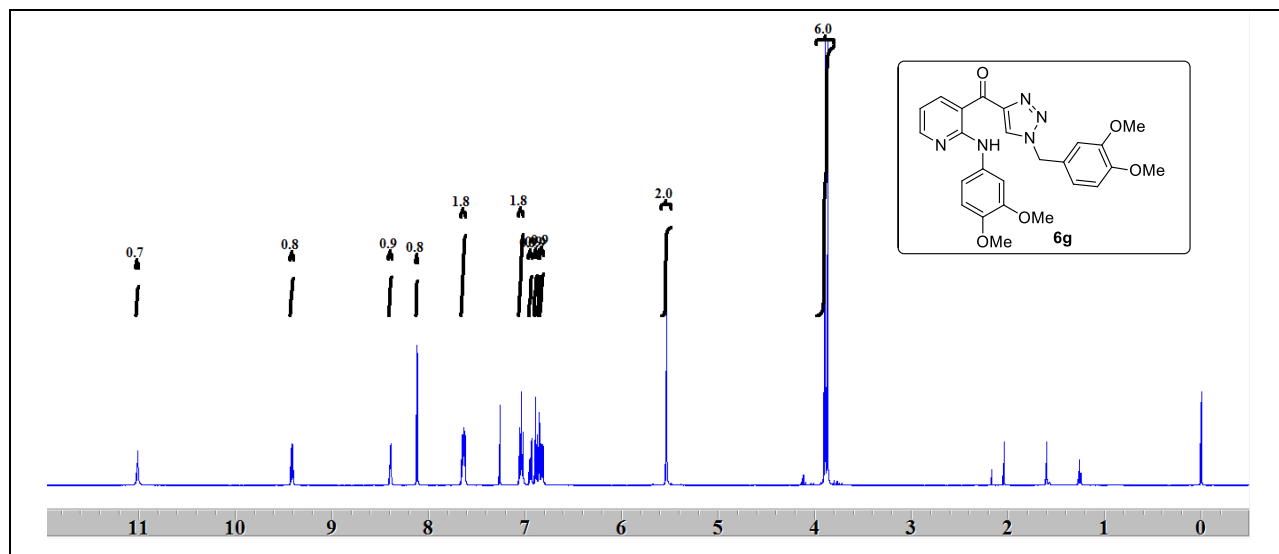

**<sup>1</sup>H NMR SPECTRUM OF COMPOUND 6g**

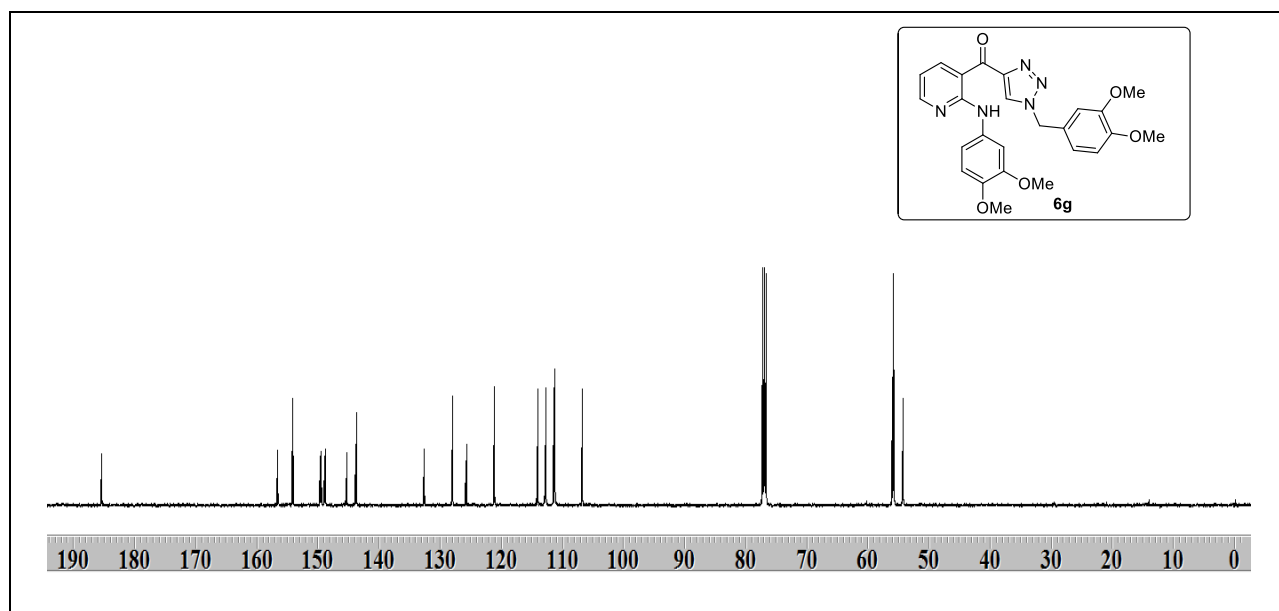

**<sup>13</sup>C NMR SPECTRUM OF COMPOUND 6g**

1

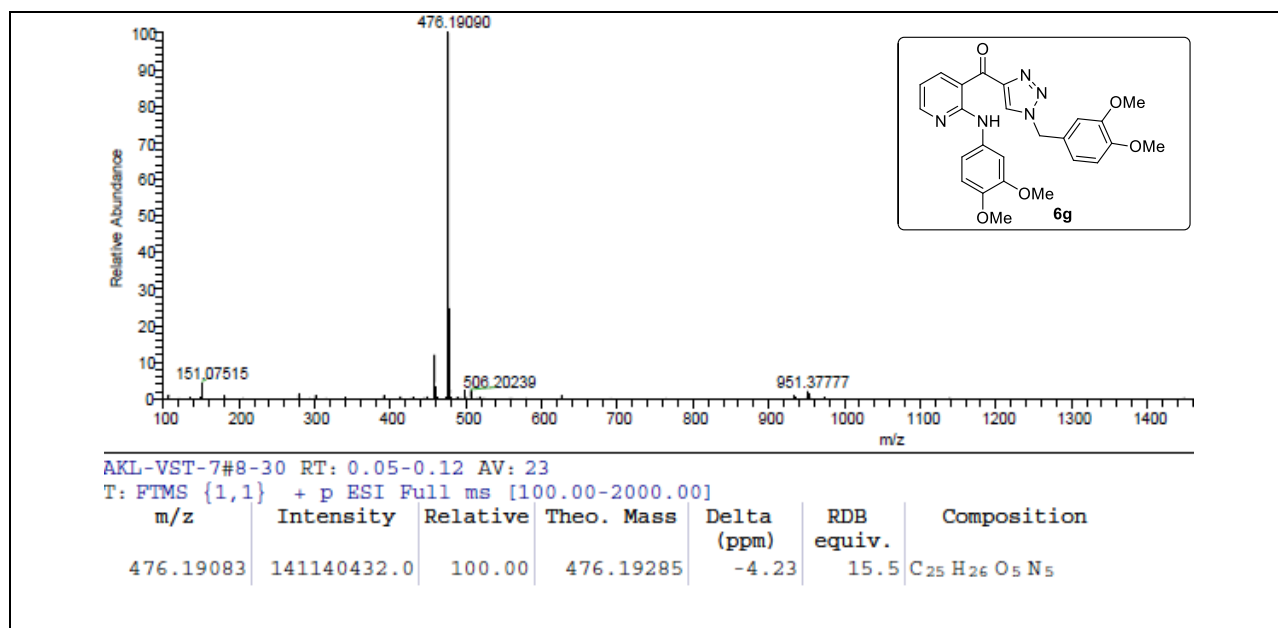

### HIGH RESOLUTION MASS SPECTRUM OF COMPOUND 6g

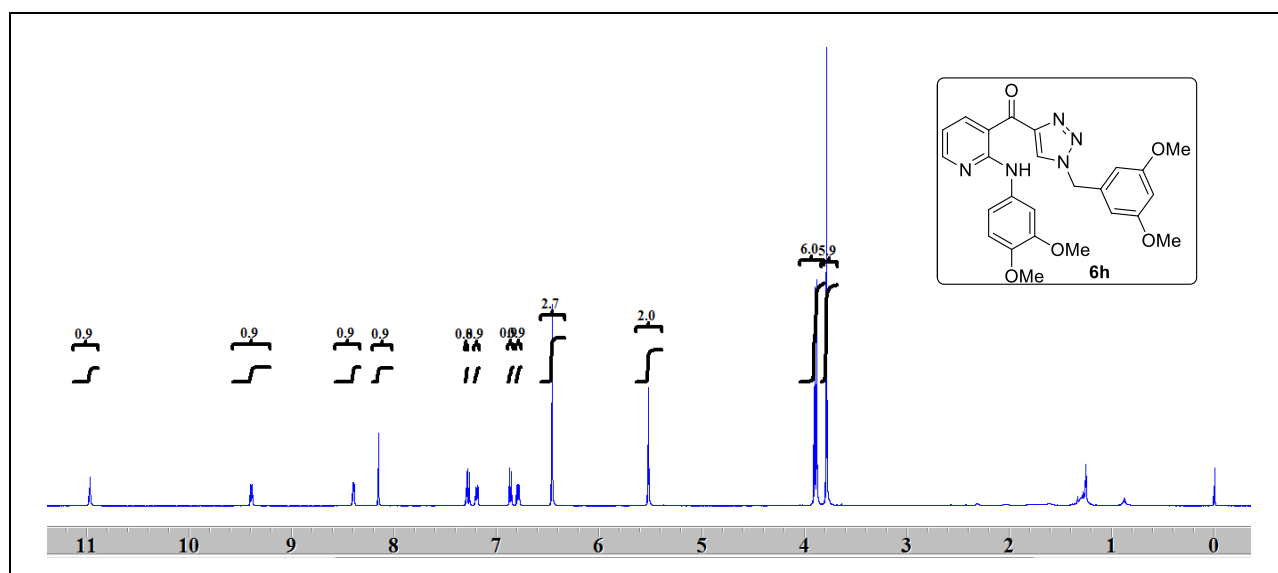

### <sup>1</sup>H NMR SPECTRUM OF COMPOUND 6h

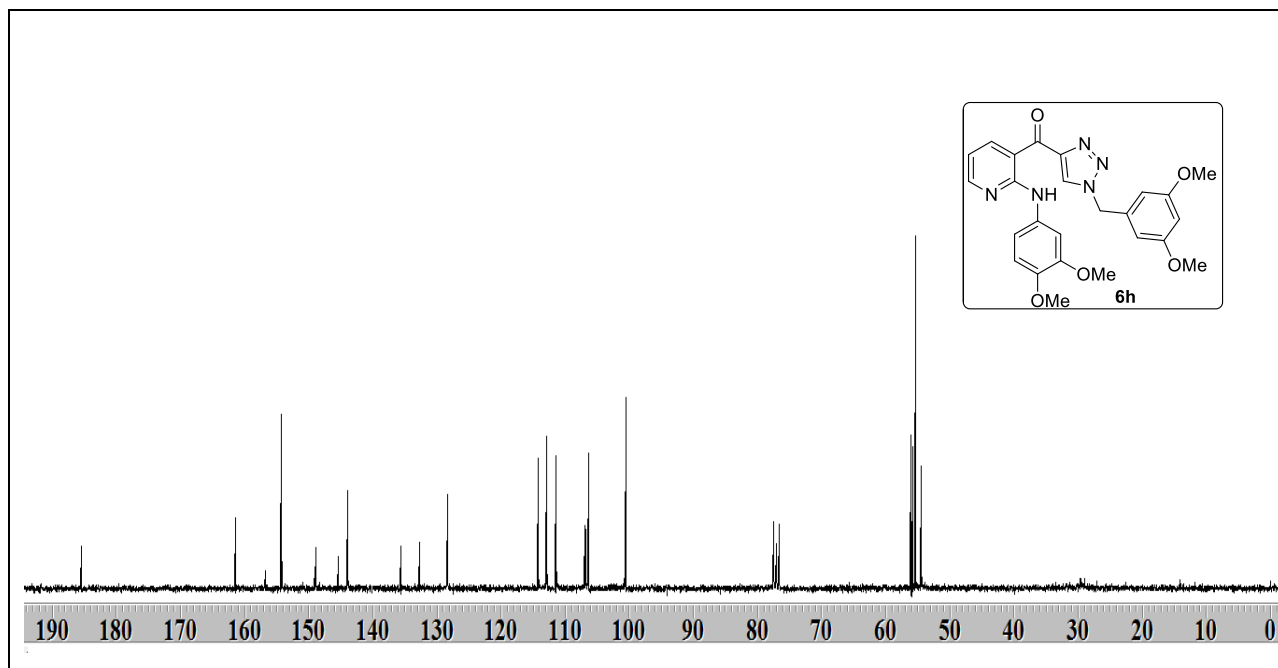

**<sup>13</sup>C NMR SPECTRUM OF COMPOUND 6h**

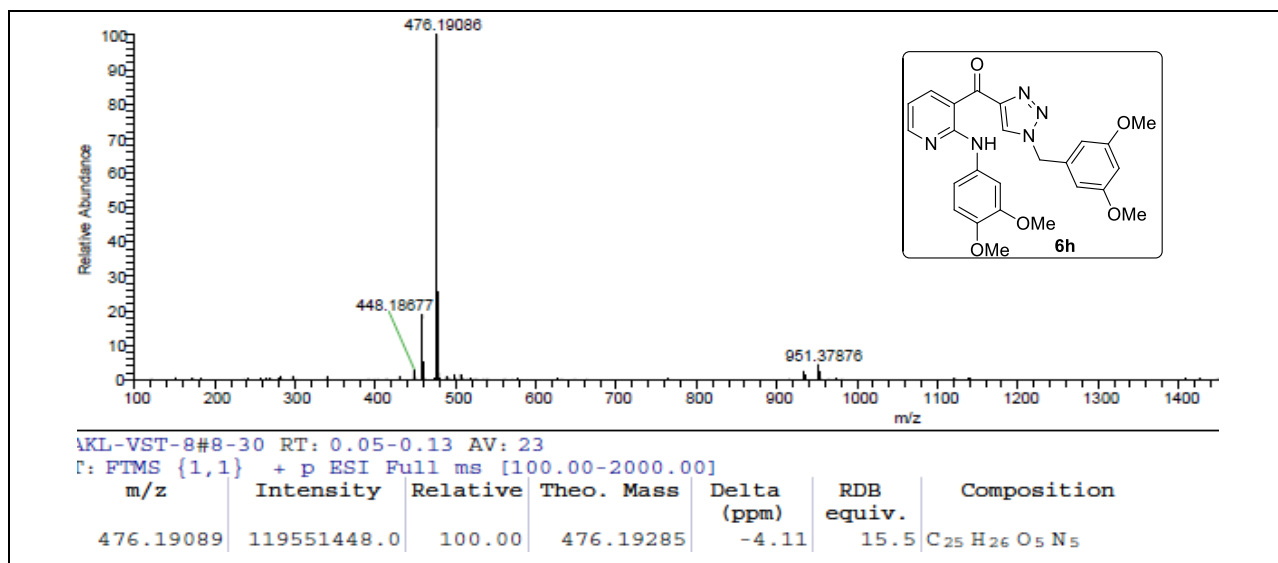

**HIGH RESOLUTION MASS SPECTRUM OF COMPOUND 6h**



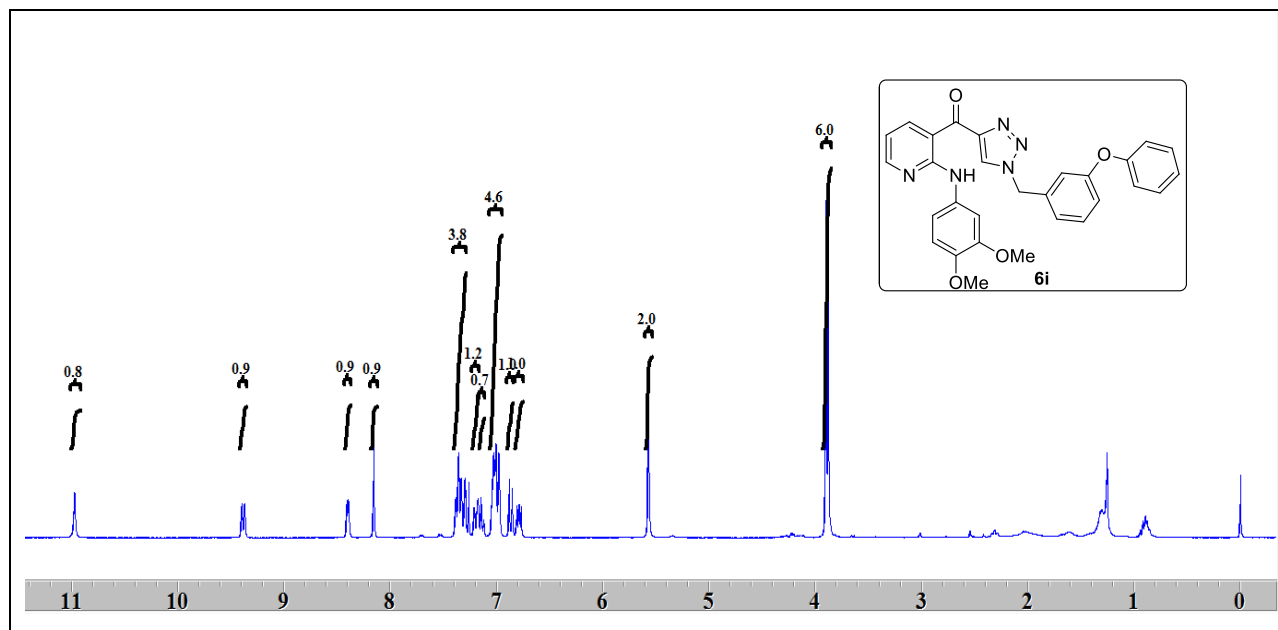

**<sup>1</sup>H NMR SPECTRUM OF COMPOUND 6i**

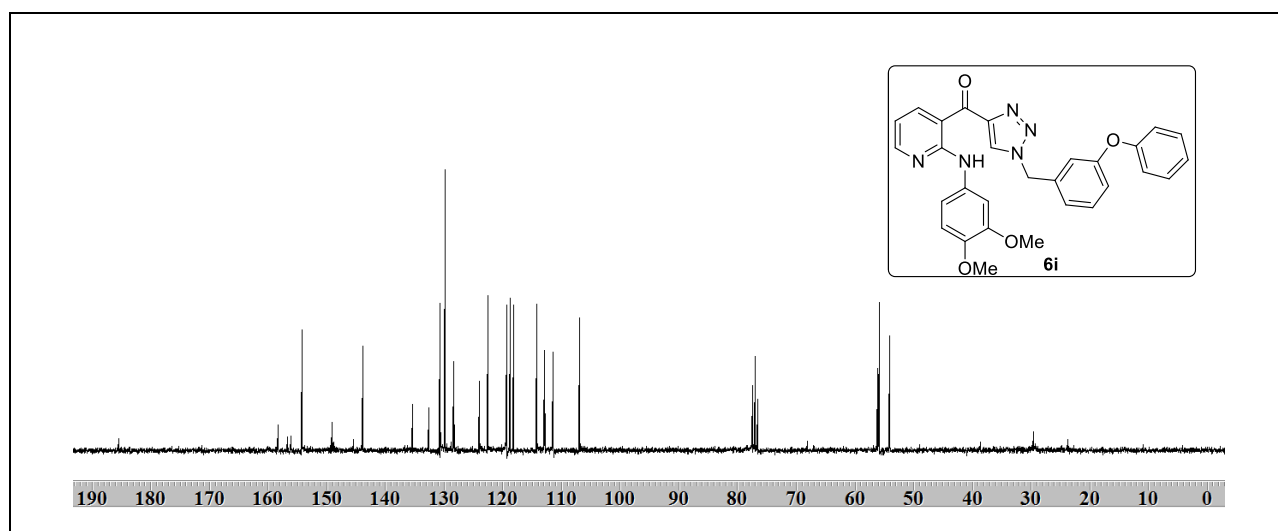

**<sup>13</sup>C NMR SPECTRUM OF COMPOUND 6i**

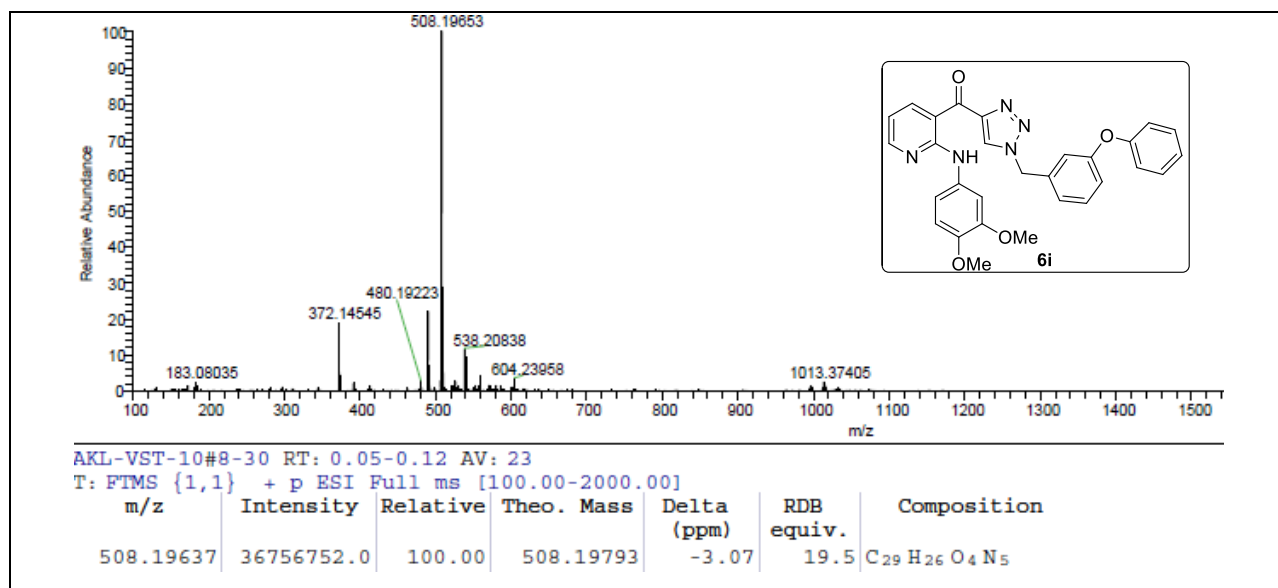

### HIGH RESOLUTION MASS SPECTRUM OF COMPOUND 6i

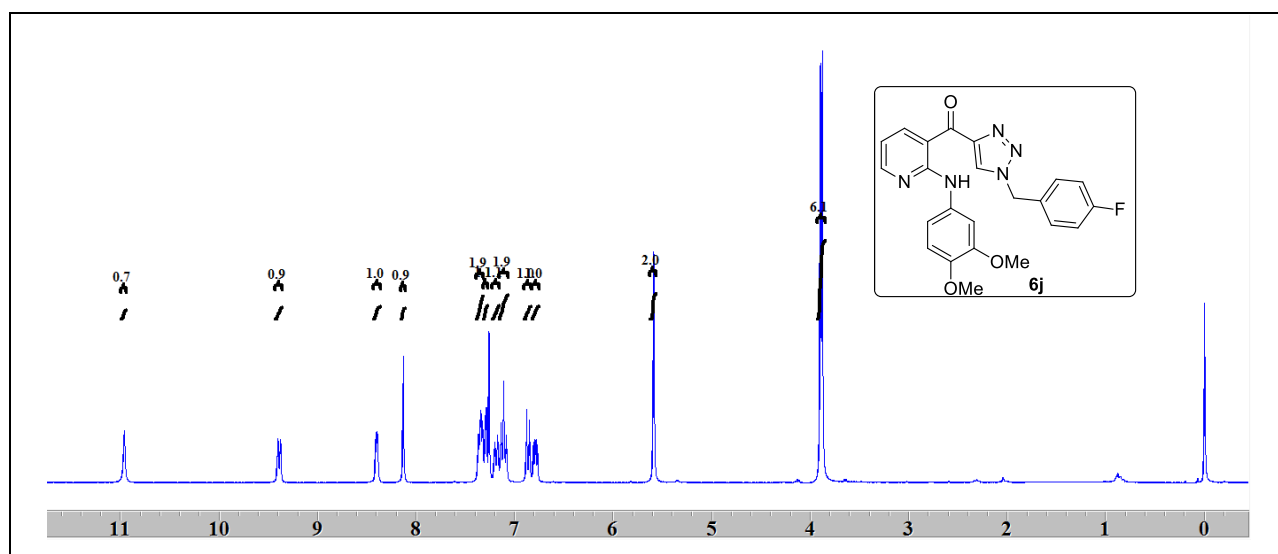

### <sup>1</sup>H NMR SPECTRUM OF COMPOUND 6j

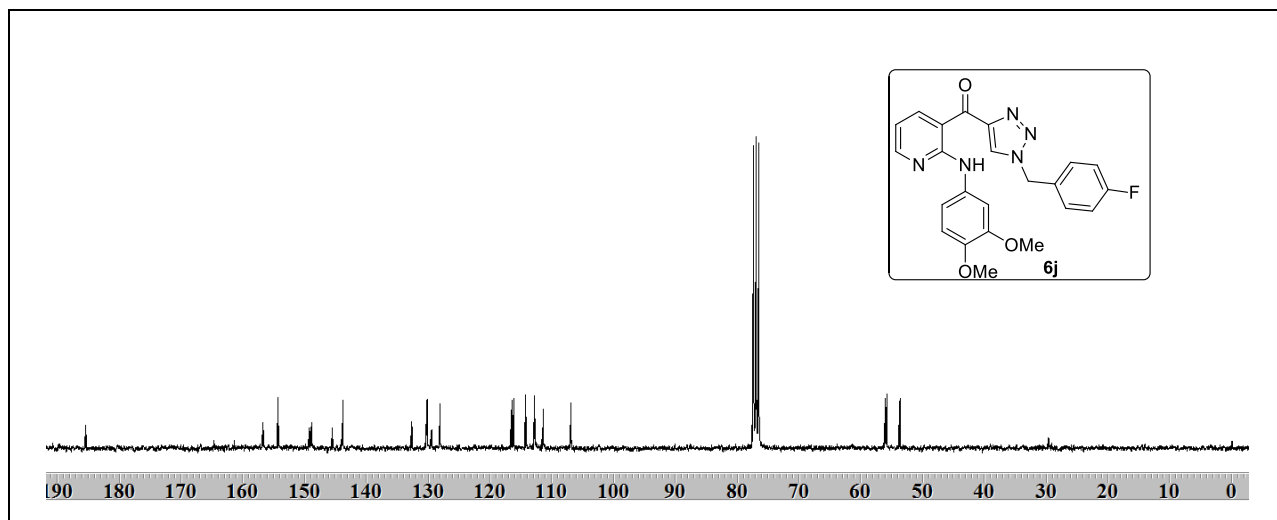

**<sup>13</sup>C NMR SPECTRUM OF COMPOUND 6j**

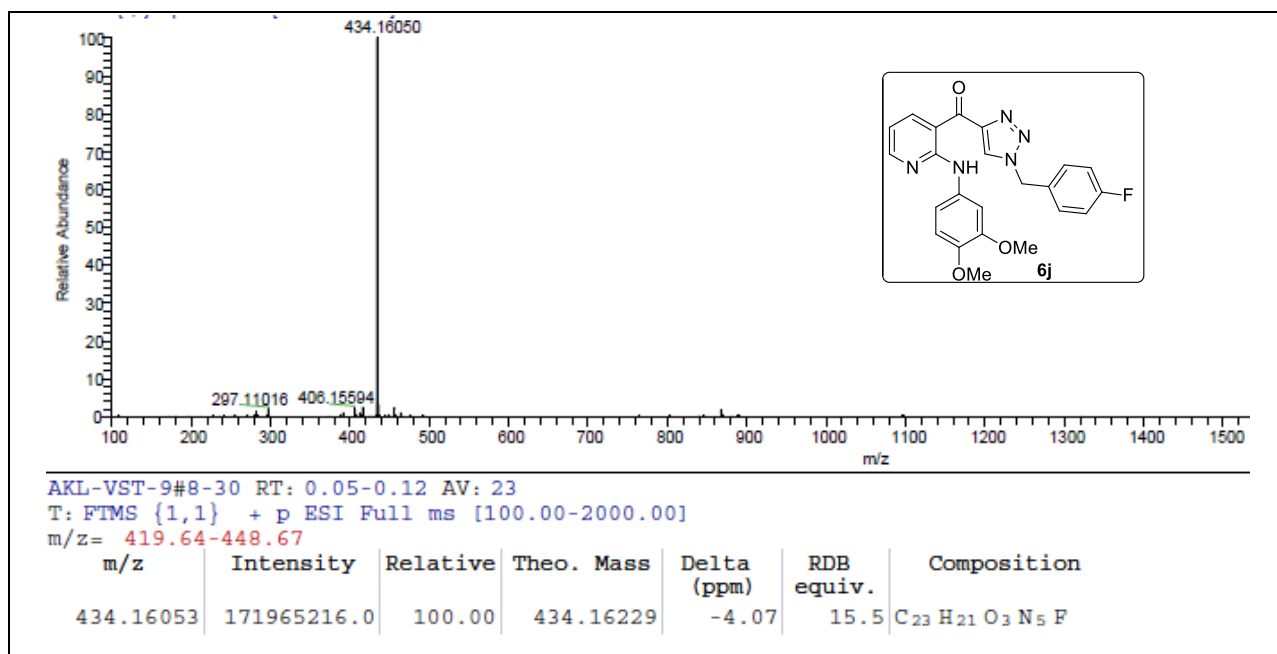

**HIGH RESOLUTION MASS SPECTRUM OF COMPOUND 6j**

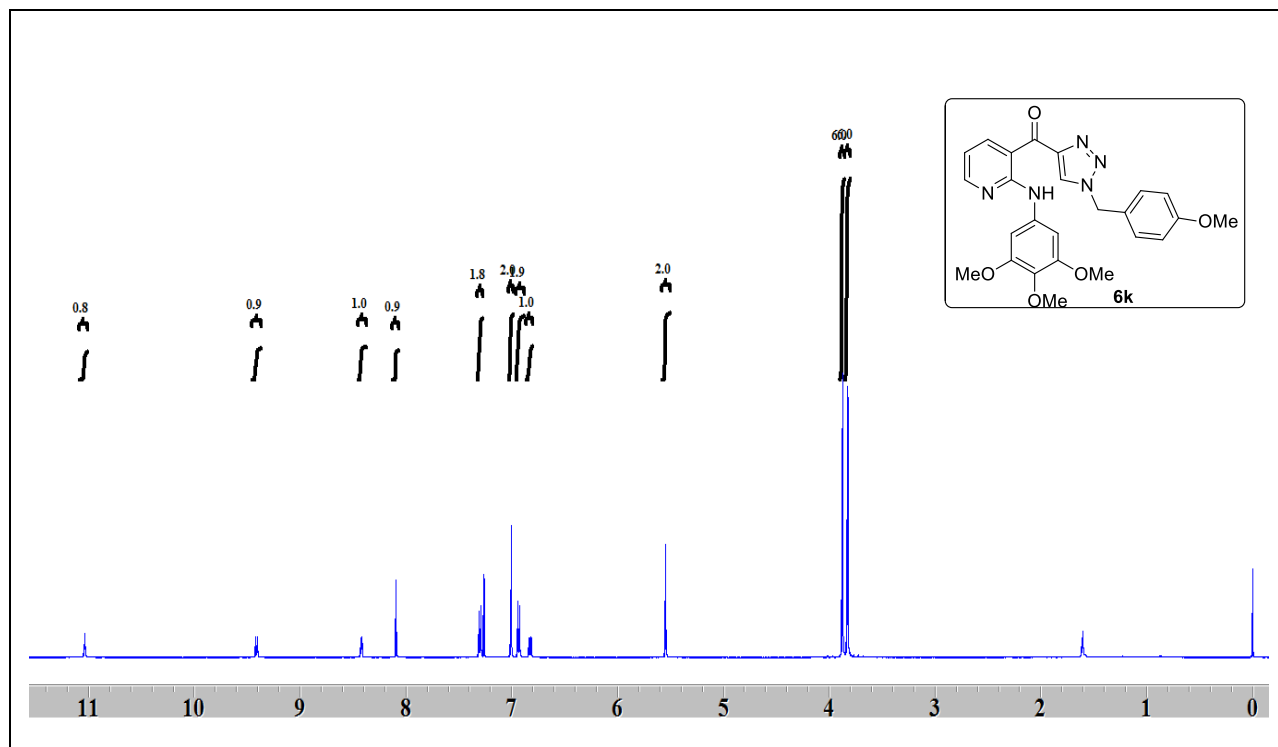

**<sup>1</sup>H NMR SPECTRUM OF COMPOUND 6k**

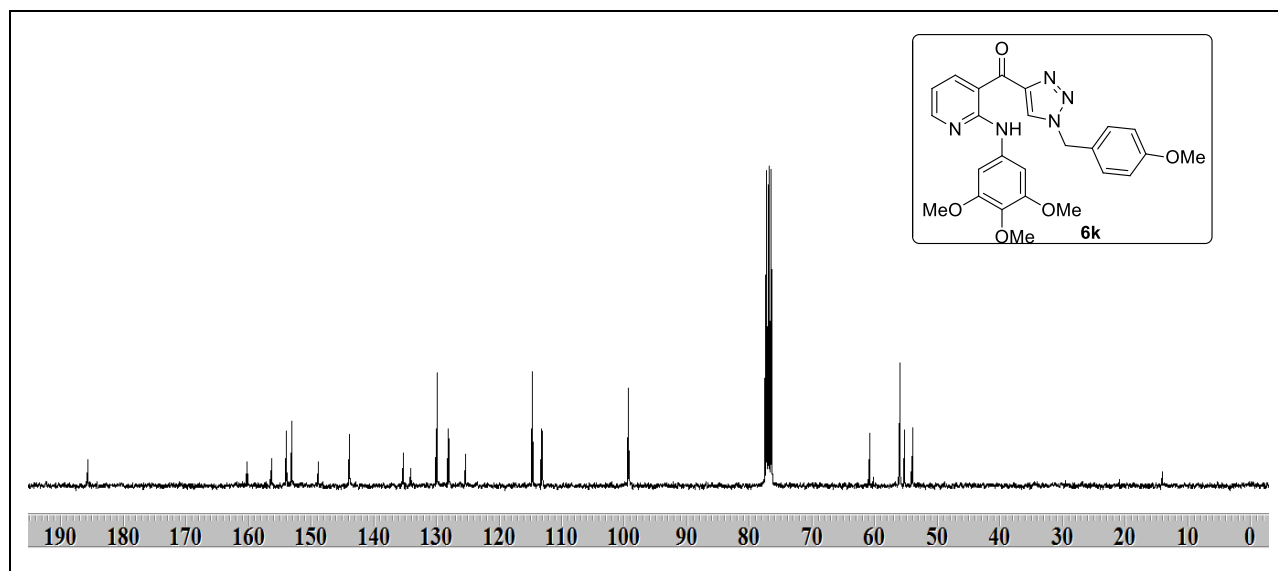

**<sup>13</sup>C NMR SPECTRUM OF COMPOUND 6k**

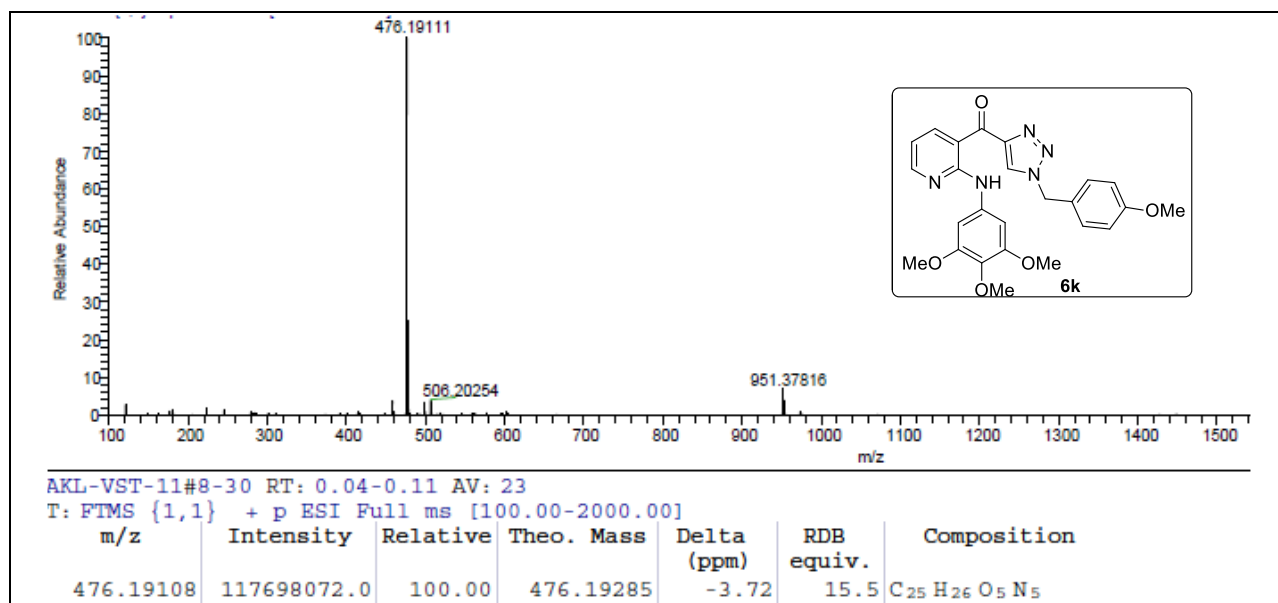

### HIGH RESOLUTION MASS SPECTRUM OF COMPOUND 6k

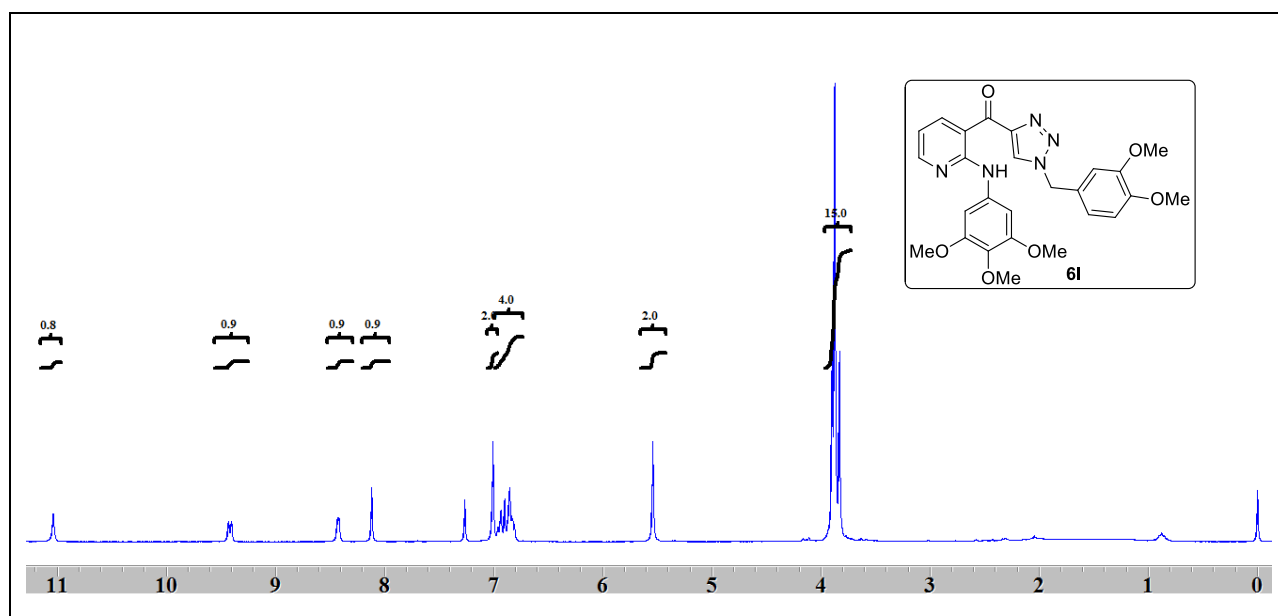

### <sup>1</sup>H NMR SPECTRUM OF COMPOUND 6l

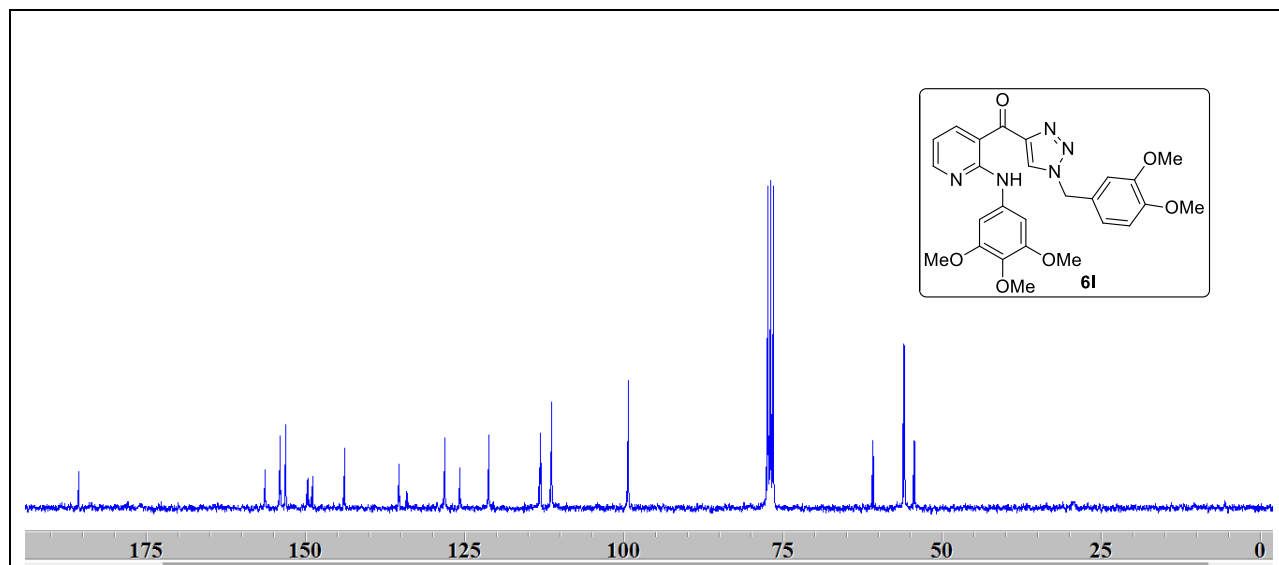

**<sup>13</sup>C NMR SPECTRUM OF COMPOUND 6I**

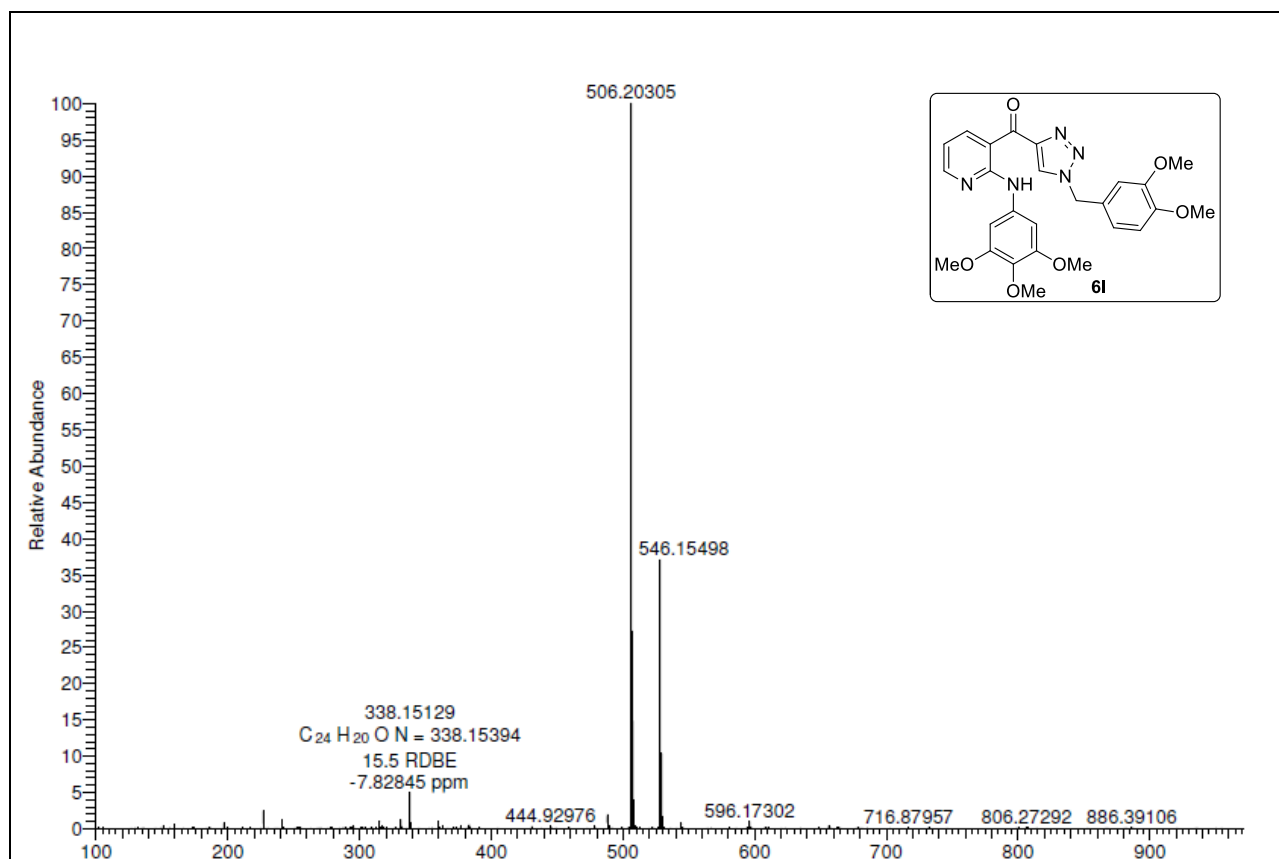

**HIGH RESOLUTION MASS SPECTRUM OF COMPOUND 6I**

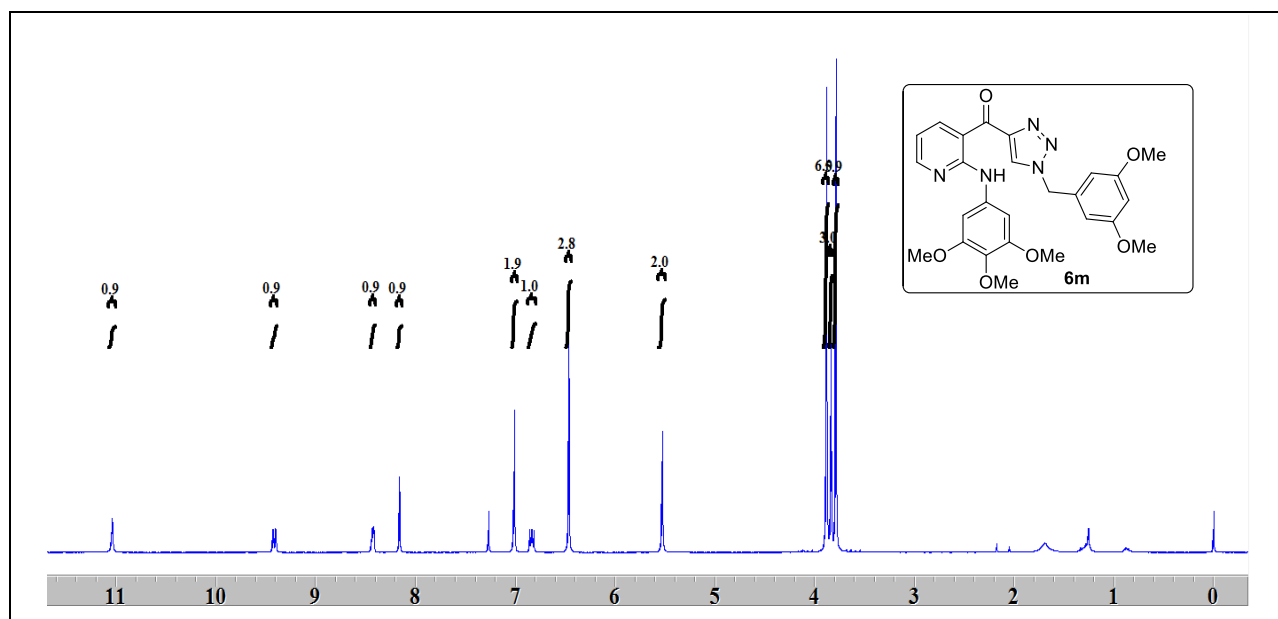

**<sup>1</sup>H NMR SPECTRUM OF COMPOUND 6m**

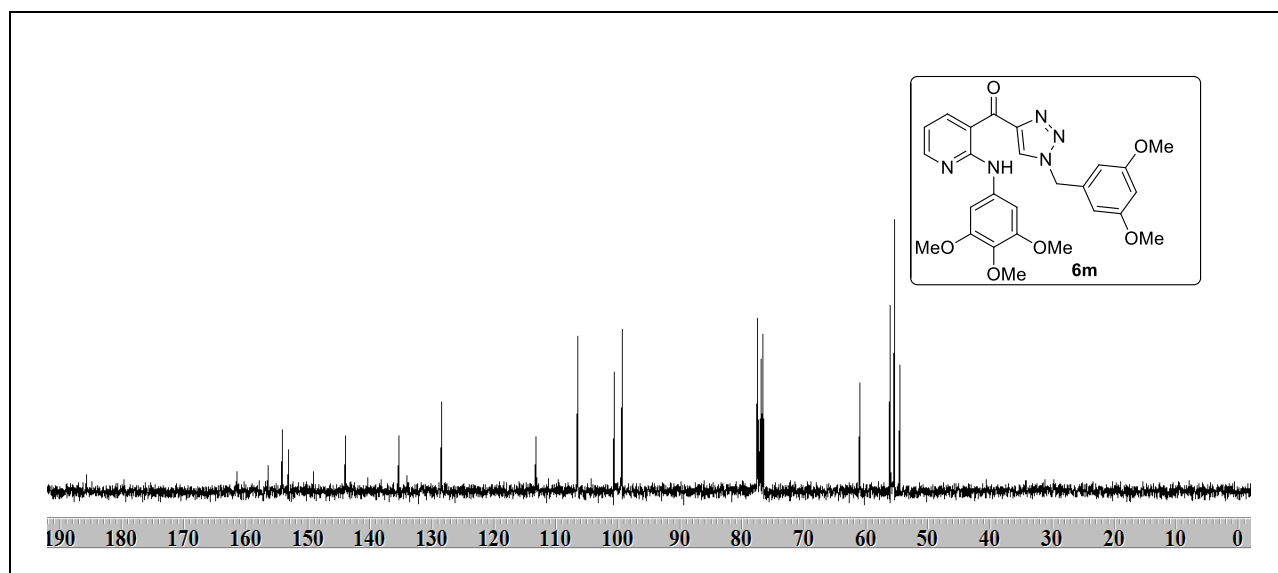

**<sup>13</sup>C NMR SPECTRUM OF COMPOUND 6m**

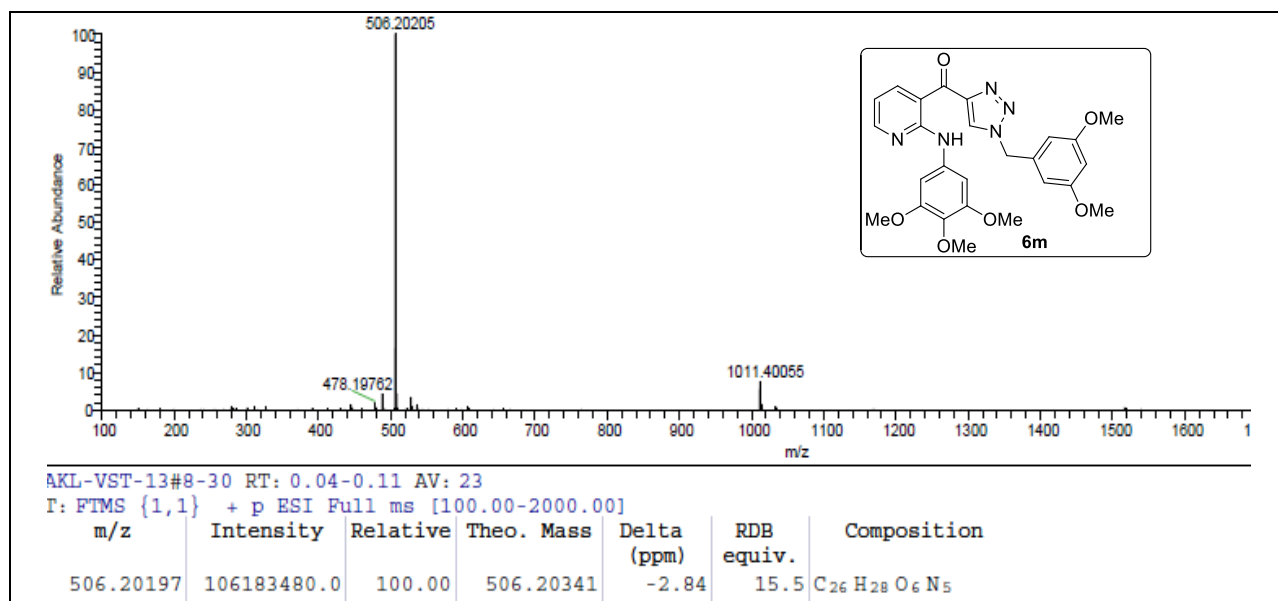

### HIGH RESOLUTION MASS SPECTRUM OF COMPOUND 6m

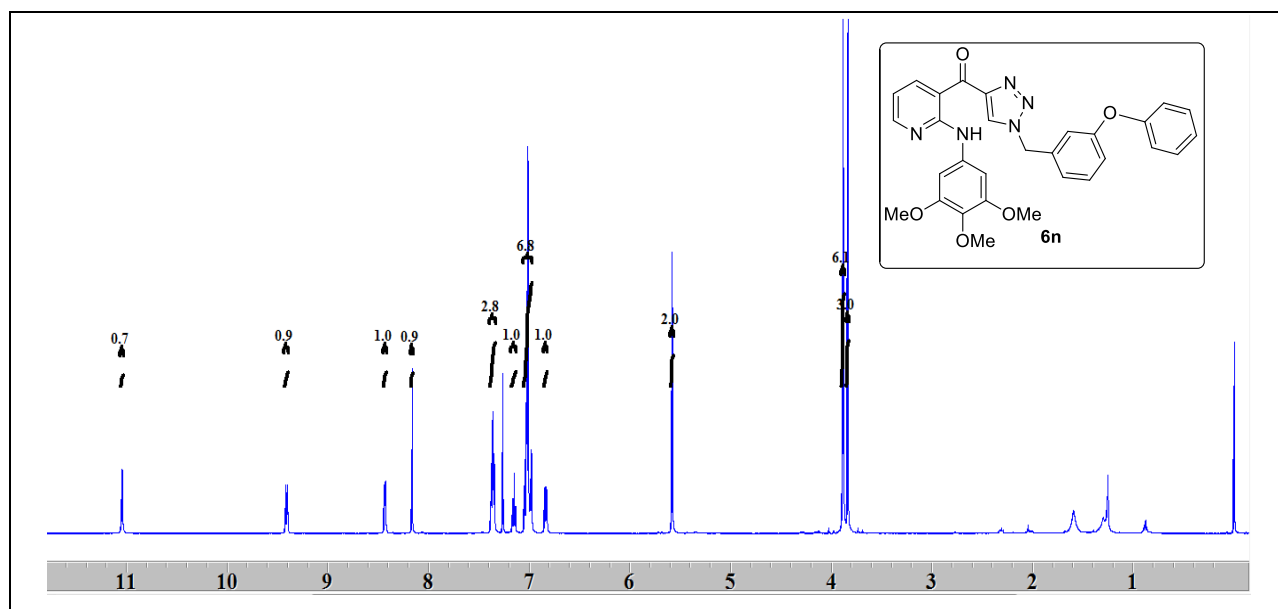

### <sup>1</sup>H NMR SPECTRUM OF COMPOUND 6n



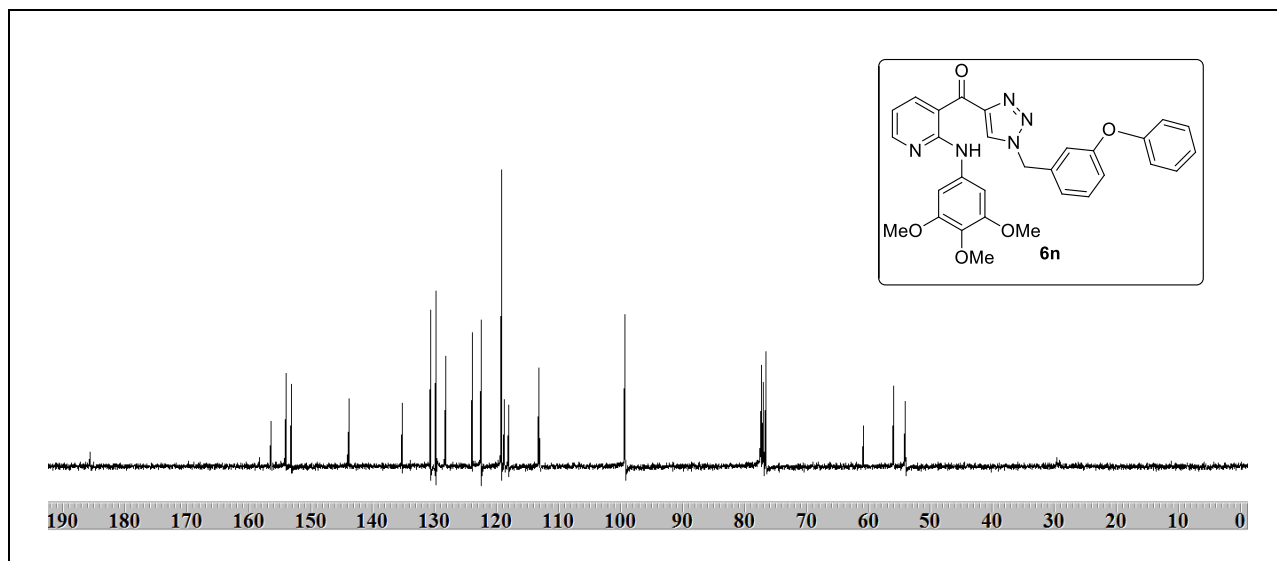

**<sup>13</sup>C NMR SPECTRUM OF COMPOUND 6n**

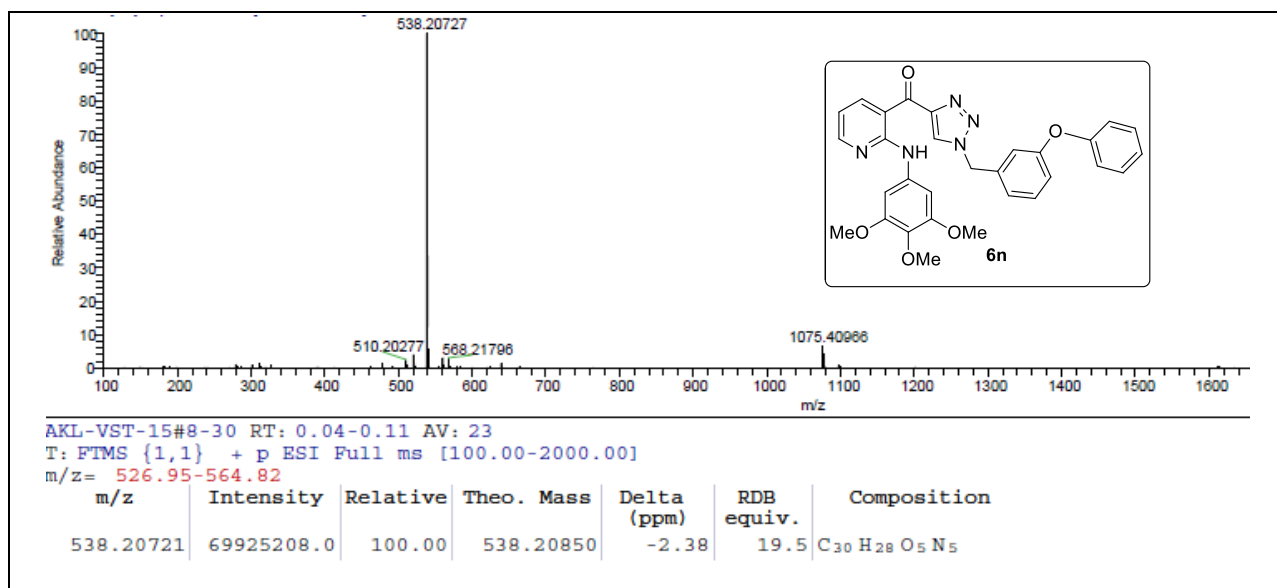

**HIGH RESOLUTION MASS SPECTRUM OF COMPOUND 6n**

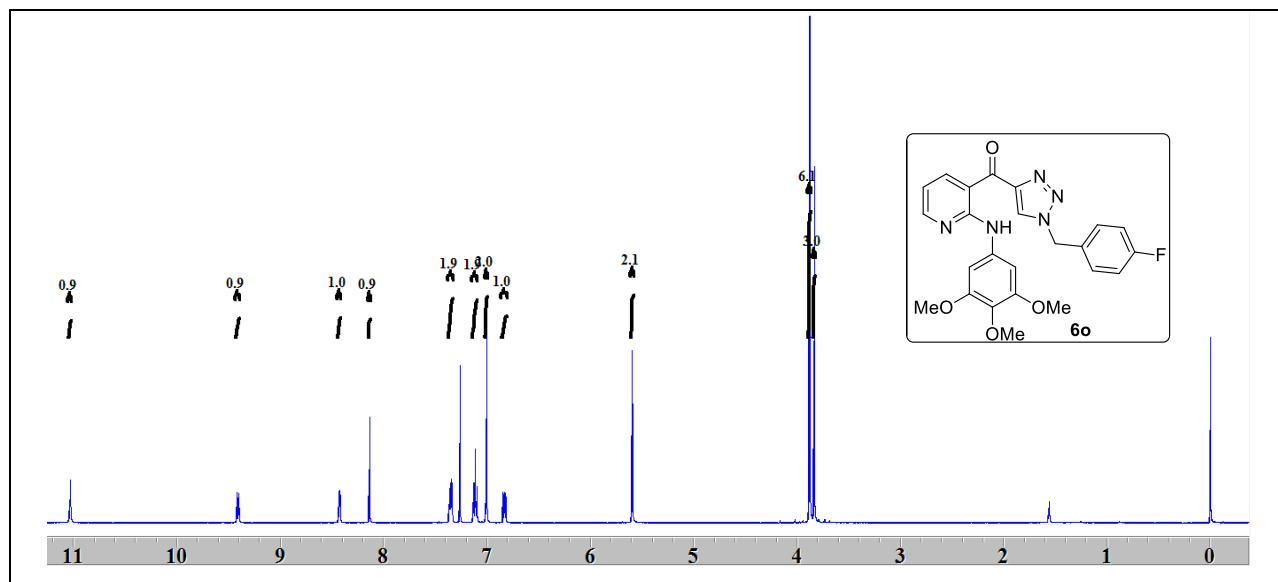

**<sup>1</sup>H NMR SPECTRUM OF COMPOUND 6o**

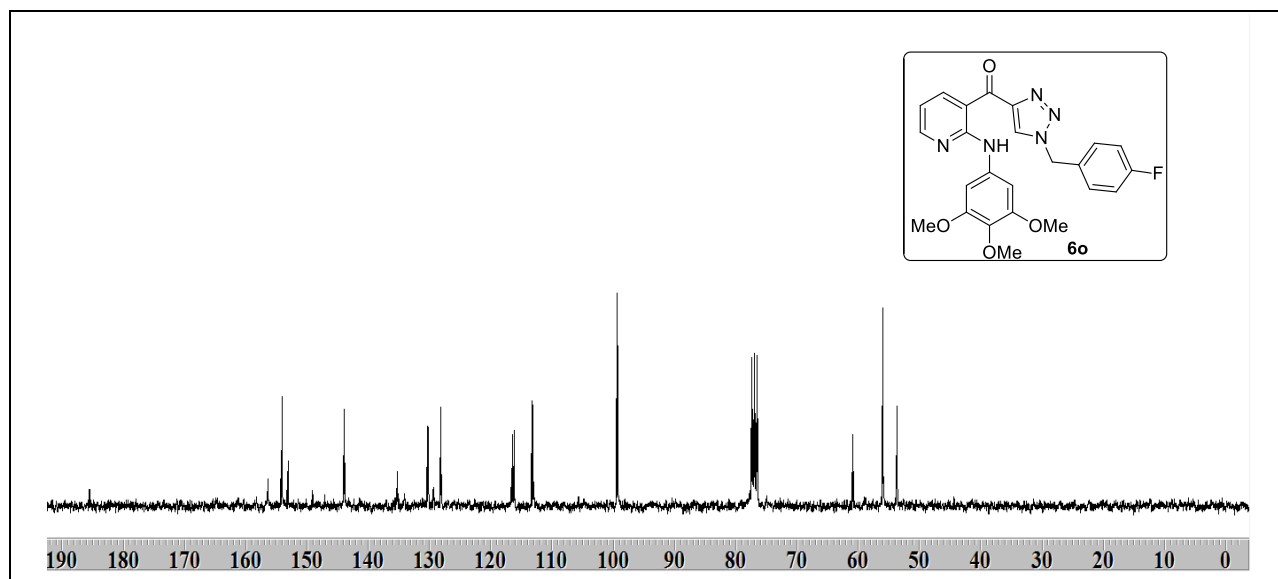

**<sup>13</sup>C NMR SPECTRUM OF COMPOUND 6o**

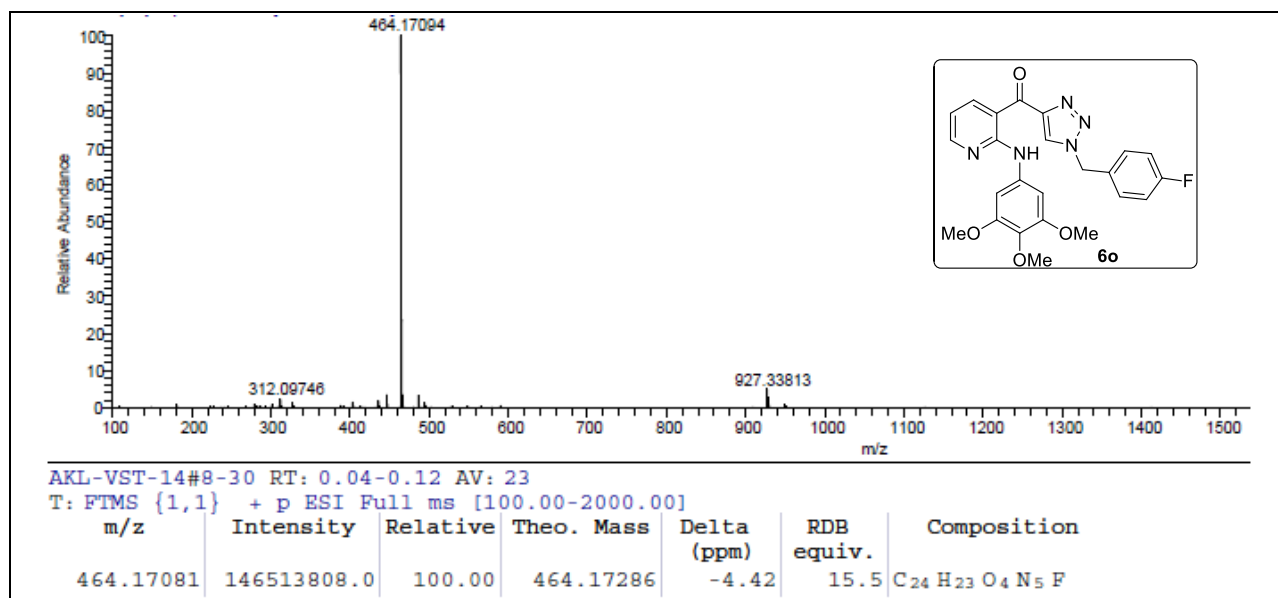

**HIGH RESOLUTION MASS SPECTRUM OF COMPOUND 6o**

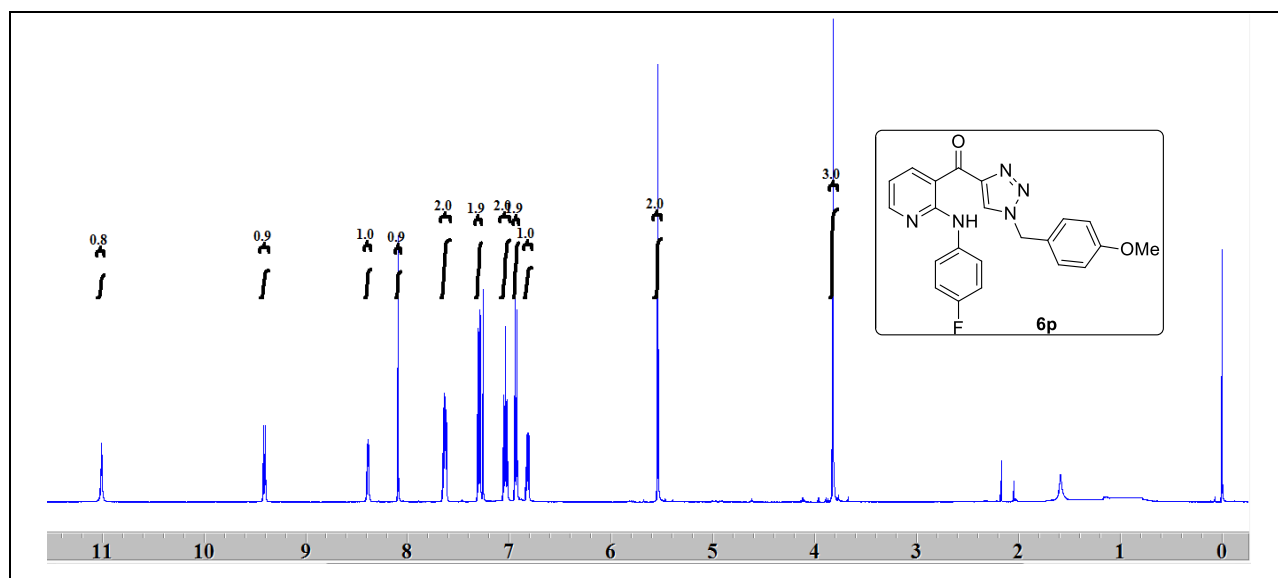

**<sup>1</sup>H NMR SPECTRUM OF COMPOUND 6p**

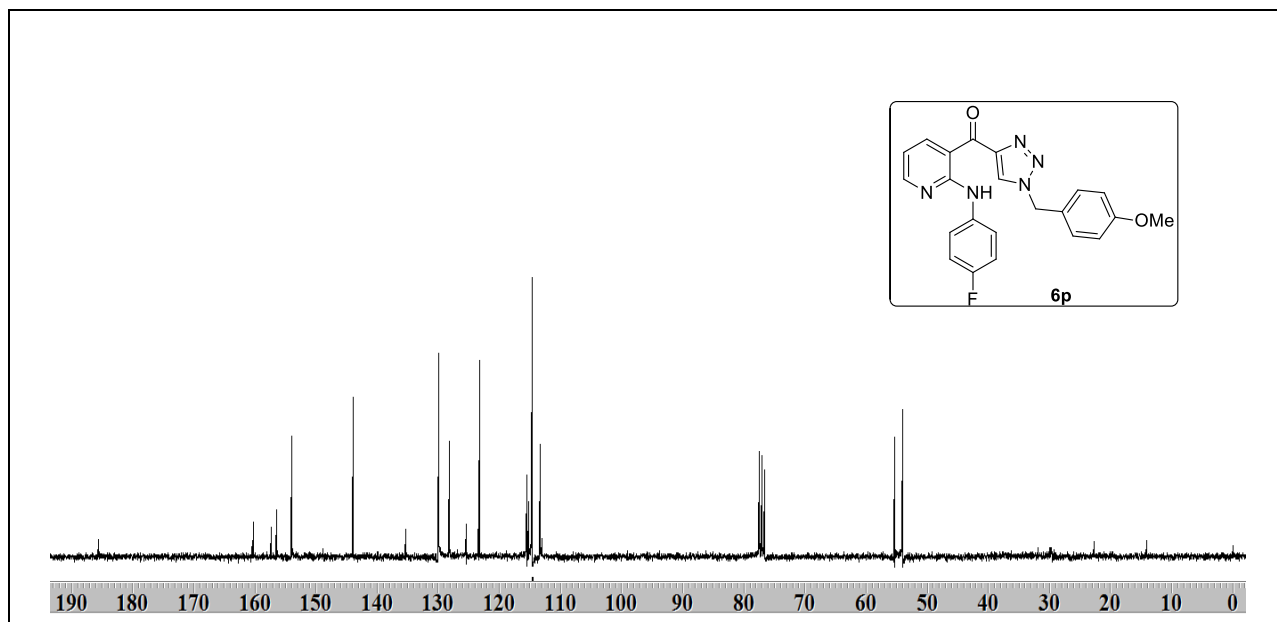

**<sup>13</sup>C NMR SPECTRUM OF COMPOUND 6p**

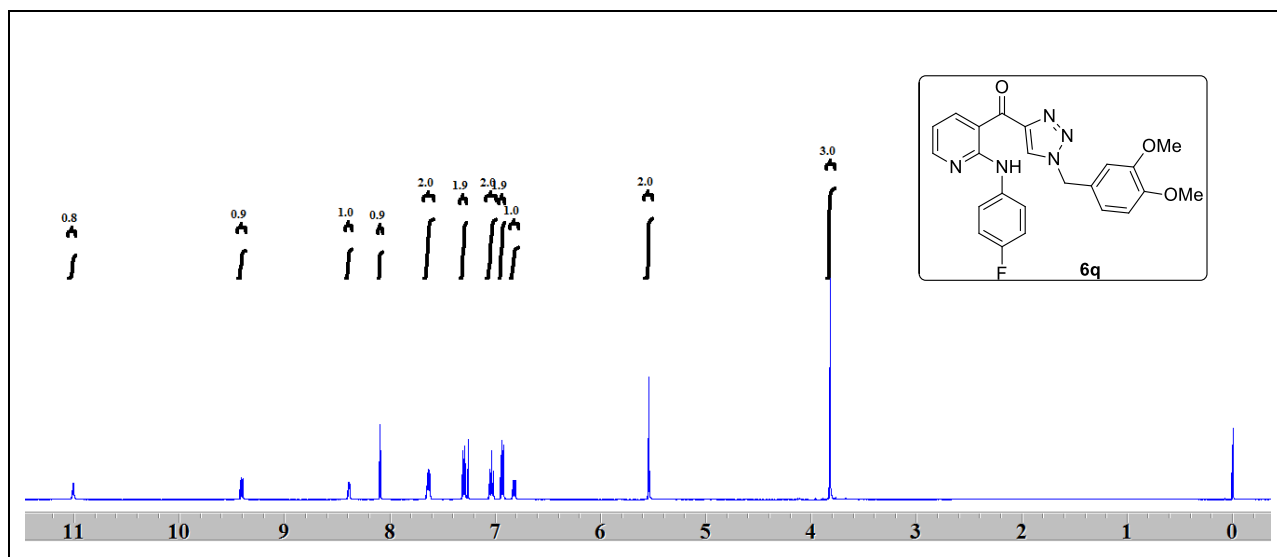

**<sup>1</sup>H NMR SPECTRUM OF COMPOUND 6q**

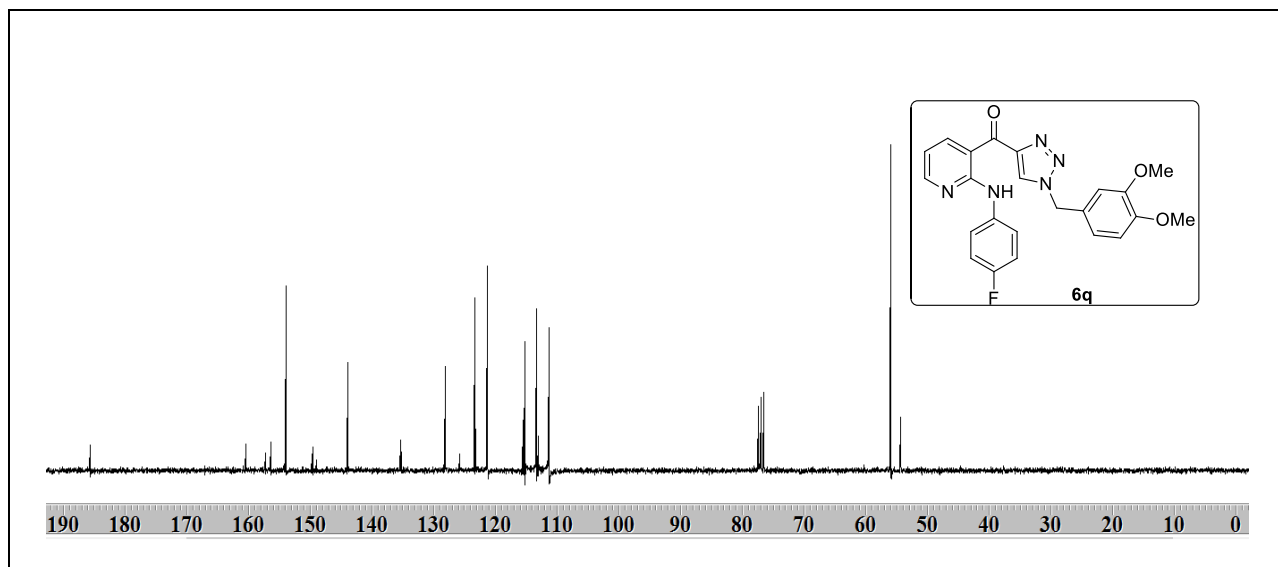

**<sup>13</sup>C NMR SPECTRUM OF COMPOUND 6q**

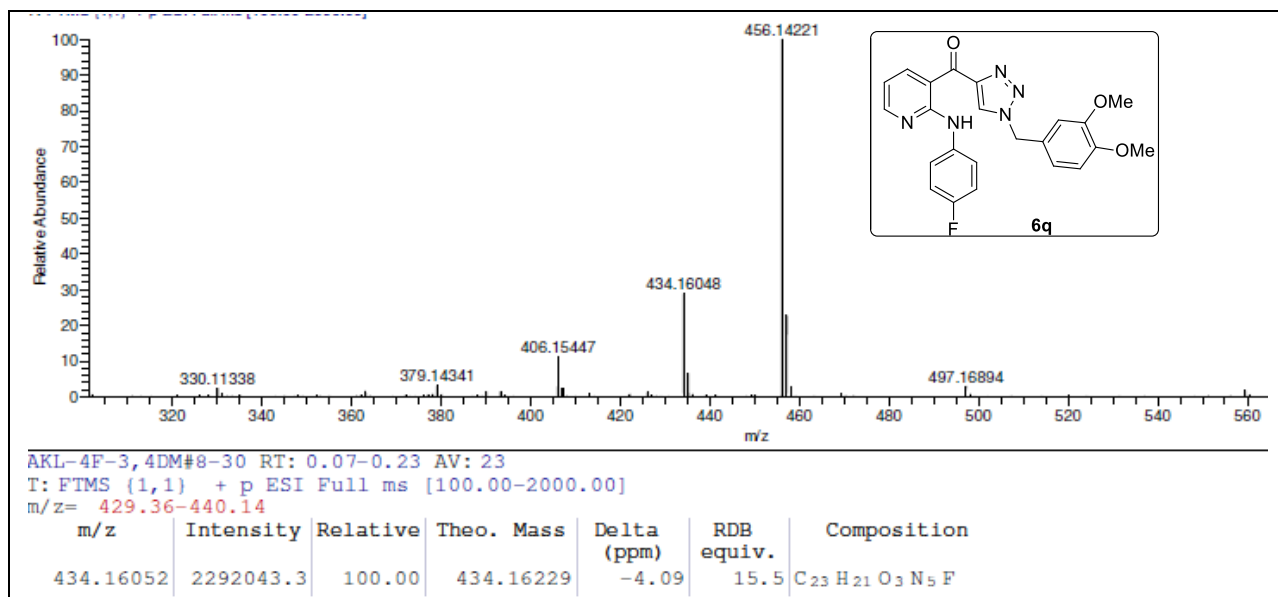

**HIGH RESOLUTION MASS SPECTRUM OF COMPOUND 6q**

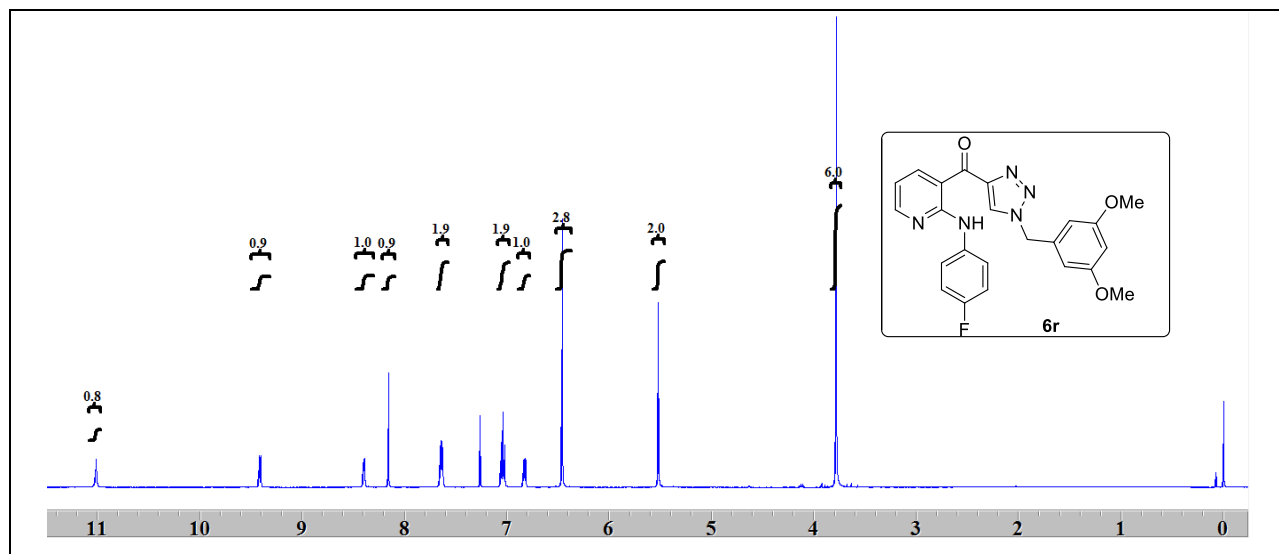

**<sup>1</sup>H NMR SPECTRUM OF COMPOUND 6r**

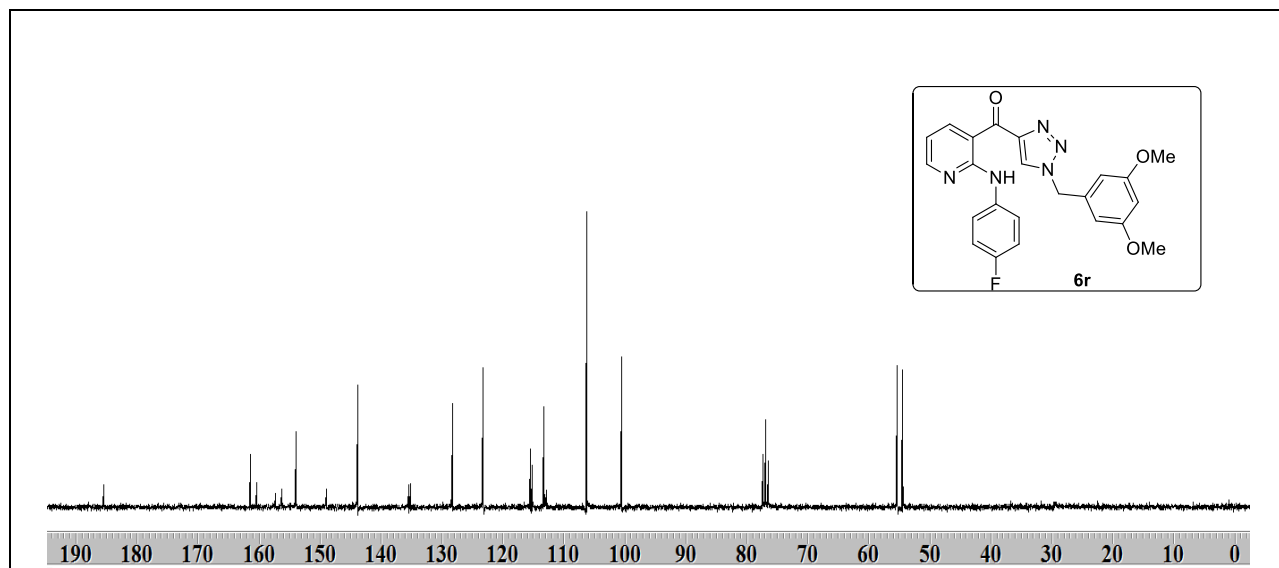

**<sup>13</sup>C NMR SPECTRUM OF COMPOUND 6r**

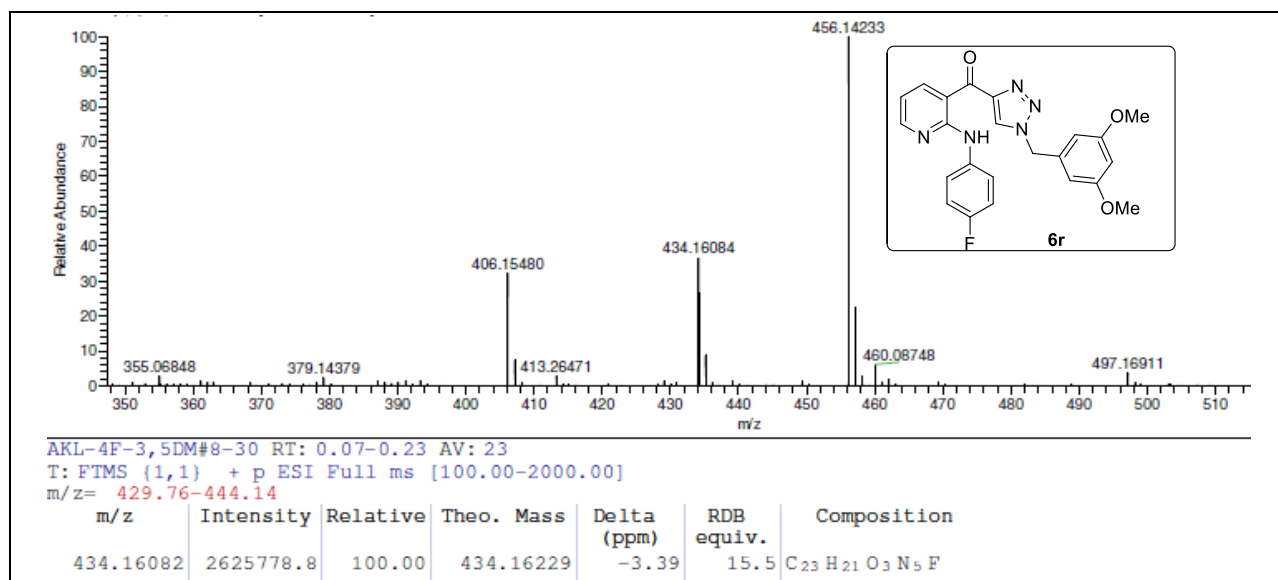

**HIGH RESOLUTION MASS SPECTRUM OF COMPOUND 6r**

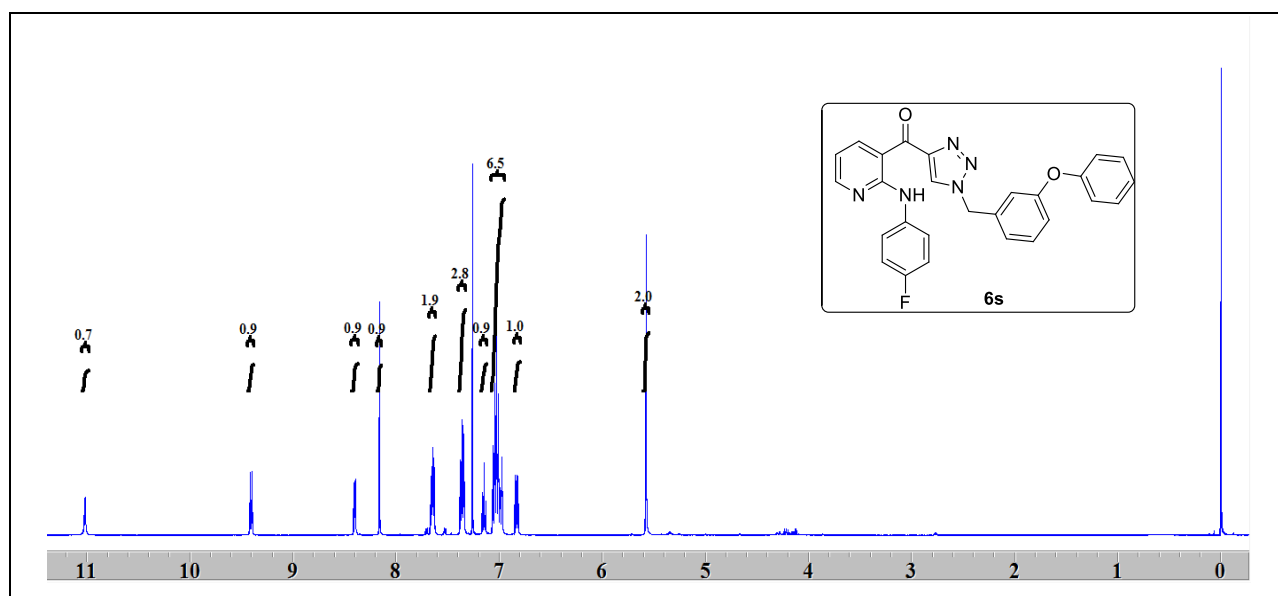

**<sup>1</sup>H NMR SPECTRUM OF COMPOUND 6s**

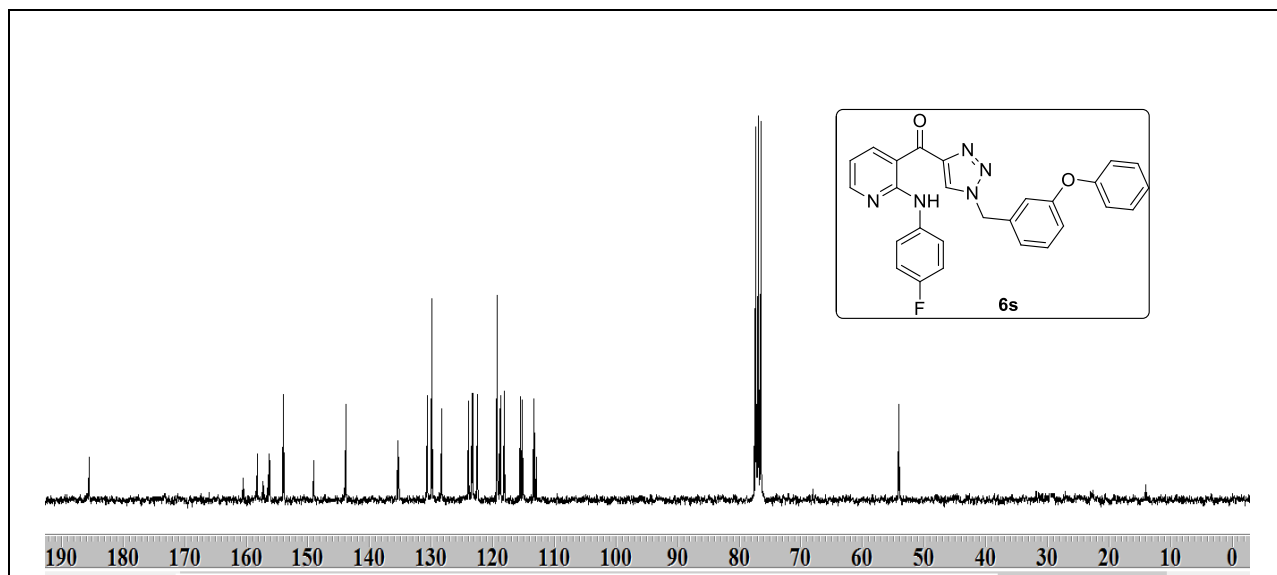

**<sup>13</sup>C NMR SPECTRUM OF COMPOUND 6s**

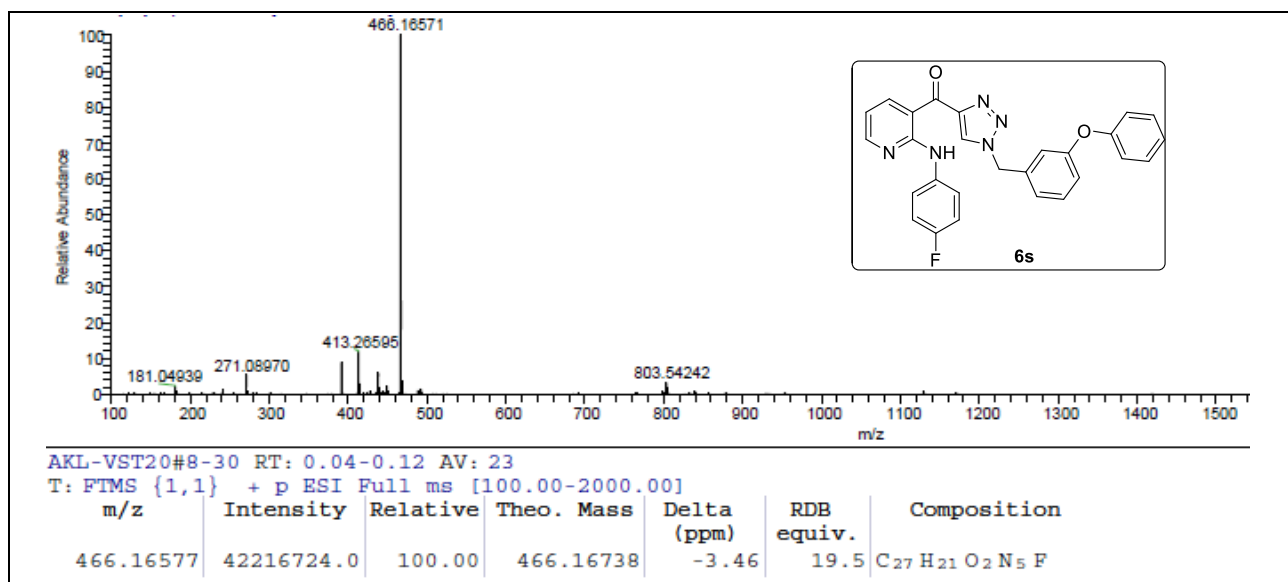

**HIGH RESOLUTION MASS SPECTRUM OF COMPOUND 6s**



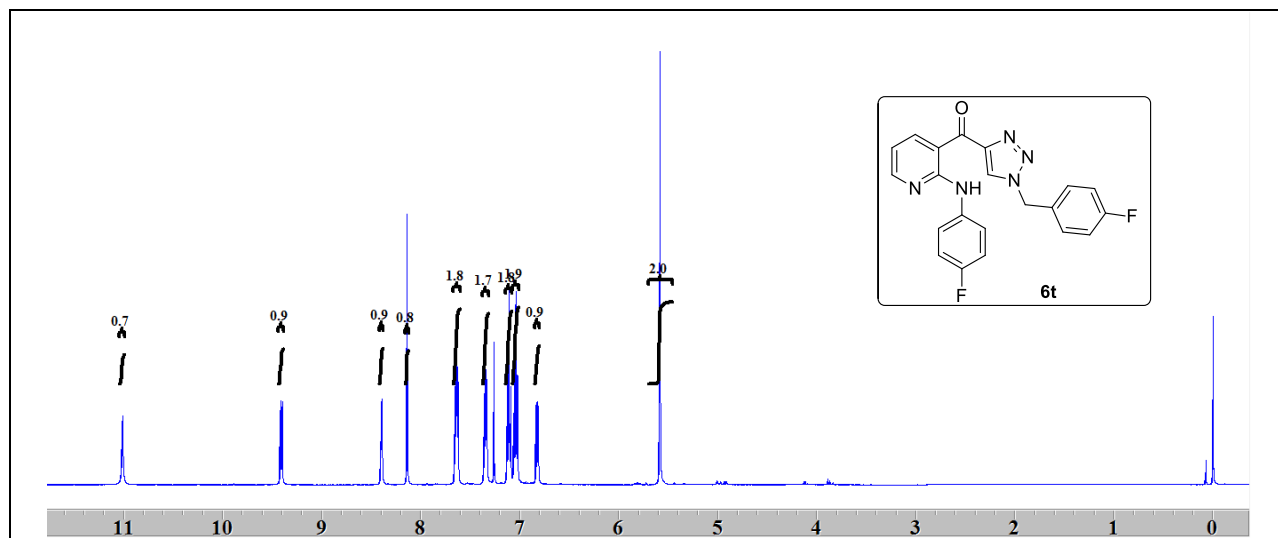

**<sup>1</sup>H NMR SPECTRUM OF COMPOUND 6t**

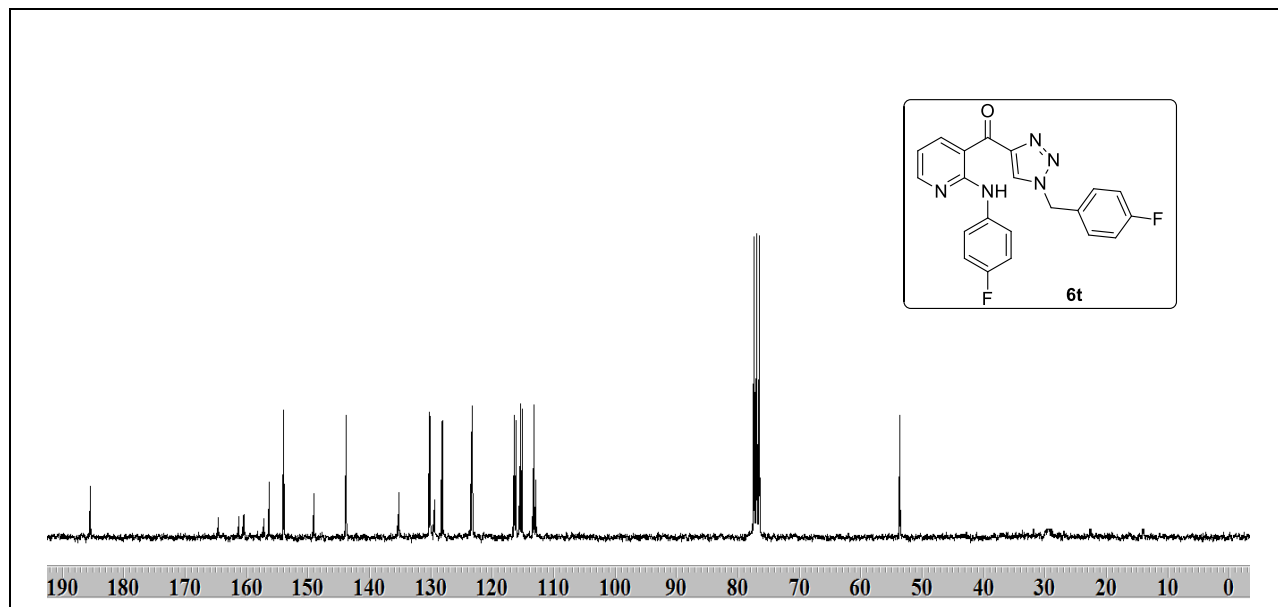

**<sup>13</sup>C NMR SPECTRUM OF COMPOUND 6t**

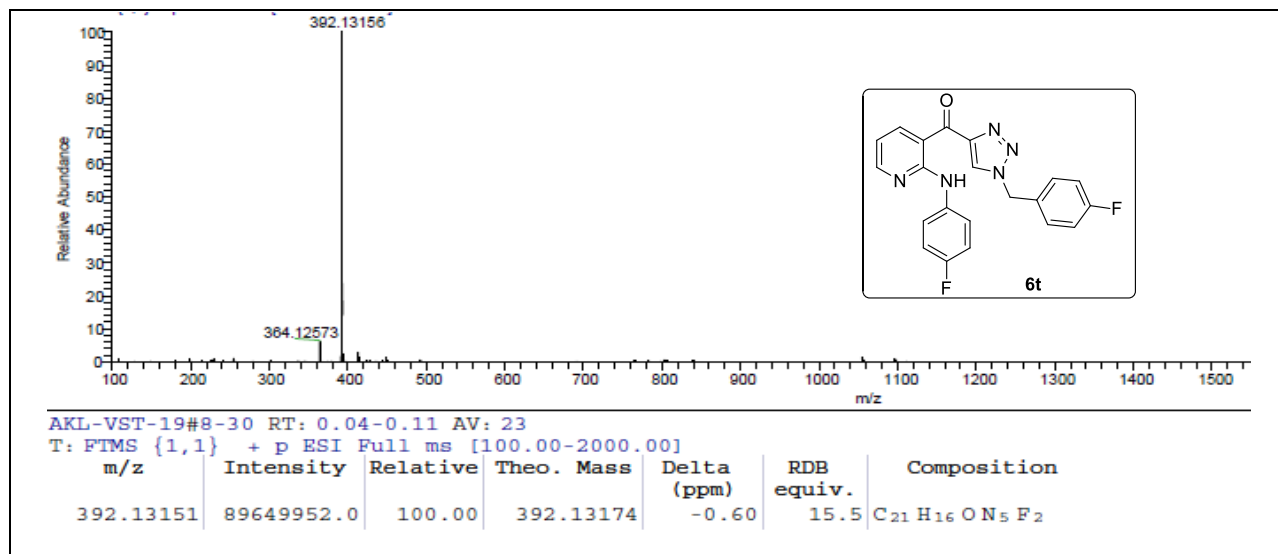

### HIGH RESOLUTION MASS SPECTRUM OF COMPOUND 6t
